# Supplementary material for: Early feeding leads to molecular maturation of the gut mucosal immune system in suckling piglets
Source: Front Immunol. 2023 May 25;14:1208891. doi: 10.3389/fimmu.2023.1208891 (PMC10248722; doi:10.3389/fimmu.2023.1208891)
Supplement: Supplementary file 2 [file Table_1.xlsx]

## Sheet: Supplementary table 3 (colon)
Unidentified ID	gProfiler converted name	gProfiler_description
ENSSSCG00000002723	AARS	alanyl-tRNA synthetase [Source:HGNC Symbol;Acc:HGNC:20]
ENSSSCG00000004145	ABRACL	ABRA C-terminal like [Source:HGNC Symbol;Acc:HGNC:21230]
ENSSSCG00000011064	ACBD5	acyl-CoA binding domain containing 5 [Source:HGNC Symbol;Acc:HGNC:23338]
ENSSSCG00000015710	ACTR3	actin related protein 3 [Source:HGNC Symbol;Acc:HGNC:170]
ENSSSCG00000015249	ADAMTS8	ADAM metallopeptidase with thrombospondin type 1 motif 8 [Source:HGNC Symbol;Acc:HGNC:224]
ENSSSCG00000001725	ADGRF5	adhesion G protein-coupled receptor F5 [Source:HGNC Symbol;Acc:HGNC:19030]
ENSSSCG00000023595	AK3	adenylate kinase 3 [Source:HGNC Symbol;Acc:HGNC:17376]
ENSSSCG00000009430	AKAP11	A-kinase anchoring protein 11 [Source:HGNC Symbol;Acc:HGNC:369]
ENSSSCG00000004307	AKIRIN2	akirin 2 [Source:HGNC Symbol;Acc:HGNC:21407]
ENSSSCG00000011147	AKR1C2	aldo-keto reductase family 1, member C1 [Source:NCBI gene;Acc:733634]
ENSSSCG00000031348	ALPK1	alpha kinase 1 [Source:HGNC Symbol;Acc:HGNC:20917]
ENSSSCG00000004392	AMD1	adenosylmethionine decarboxylase 1 [Source:HGNC Symbol;Acc:HGNC:457]
ENSSSCG00000028633	AMMECR1L	AMMECR1 like [Source:HGNC Symbol;Acc:HGNC:28658]
ENSSSCG00000016212	ANKZF1	ankyrin repeat and zinc finger peptidyl tRNA hydrolase 1 [Source:HGNC Symbol;Acc:HGNC:25527]
ENSSSCG00000009128	AP1AR	adaptor related protein complex 1 associated regulatory protein [Source:HGNC Symbol;Acc:HGNC:28808]
ENSSSCG00000013492	APBA3	amyloid beta precursor protein binding family A member 3 [Source:HGNC Symbol;Acc:HGNC:580]
ENSSSCG00000040060	APEX1	apurinic/apyrimidinic endodeoxyribonuclease 1 [Source:HGNC Symbol;Acc:HGNC:587]
ENSSSCG00000012348	APEX2	apurinic/apyrimidinic endodeoxyribonuclease 2 [Source:HGNC Symbol;Acc:HGNC:17889]
ENSSSCG00000032949	APH1B	aph-1 homolog B, gamma-secretase subunit [Source:HGNC Symbol;Acc:HGNC:24080]
ENSSSCG00000012459	APOOL	apolipoprotein O like [Source:HGNC Symbol;Acc:HGNC:24009]
ENSSSCG00000013992	ARF1	ADP ribosylation factor 1 [Source:HGNC Symbol;Acc:HGNC:652]
ENSSSCG00000027565	ARHGAP45	Rho GTPase activating protein 45 [Source:HGNC Symbol;Acc:HGNC:17102]
ENSSSCG00000012508	ARMCX6	armadillo repeat containing X-linked 6 [Source:HGNC Symbol;Acc:HGNC:26094]
ENSSSCG00000032216	ATMIN	ATM interactor [Source:HGNC Symbol;Acc:HGNC:29034]
ENSSSCG00000016990	ATP6V0E1	ATPase H+ transporting V0 subunit e1 [Source:HGNC Symbol;Acc:HGNC:863]
ENSSSCG00000038657	ATPAF1	ATP synthase mitochondrial F1 complex assembly factor 1 [Source:HGNC Symbol;Acc:HGNC:18803]
ENSSSCG00000021774	B3GALNT1	beta-1,3-N-acetylgalactosaminyltransferase 1 (globoside blood group) [Source:HGNC Symbol;Acc:HGNC:918]
ENSSSCG00000027229	B3GNTL1	UDP-GlcNAc:betaGal beta-1,3-N-acetylglucosaminyltransferase like 1 [Source:HGNC Symbol;Acc:HGNC:21727]
ENSSSCG00000006360	B4GALT3	beta-1,4-galactosyltransferase 3 [Source:HGNC Symbol;Acc:HGNC:926]
ENSSSCG00000011903	B4GALT4	beta-1,4-galactosyltransferase 4 [Source:HGNC Symbol;Acc:HGNC:927]
ENSSSCG00000031073	BABAM1	BRISC and BRCA1 A complex member 1 [Source:HGNC Symbol;Acc:HGNC:25008]
ENSSSCG00000012961	BANF1	barrier to autointegration factor 1 [Source:HGNC Symbol;Acc:HGNC:17397]
ENSSSCG00000022361	BANK1	B cell scaffold protein with ankyrin repeats 1 [Source:HGNC Symbol;Acc:HGNC:18233]
ENSSSCG00000017927	BCL6B	BCL6B transcription repressor [Source:HGNC Symbol;Acc:HGNC:1002]
ENSSSCG00000017796	BLMH	bleomycin hydrolase [Source:HGNC Symbol;Acc:HGNC:1059]
ENSSSCG00000014327	BRD8	bromodomain containing 8 [Source:HGNC Symbol;Acc:HGNC:19874]
ENSSSCG00000012014	BTG3	BTG anti-proliferation factor 3 [Source:HGNC Symbol;Acc:HGNC:1132]
ENSSSCG00000040426	C10orf143	chromosome 10 open reading frame 143 [Source:HGNC Symbol;Acc:HGNC:48677]
ENSSSCG00000015027	C11orf1	chromosome 11 open reading frame 1 [Source:HGNC Symbol;Acc:HGNC:1163]
ENSSSCG00000023323	C11orf98	chromosome 11 open reading frame 98 [Source:HGNC Symbol;Acc:HGNC:51238]
ENSSSCG00000030131	C15orf40	chromosome 15 open reading frame 40 [Source:HGNC Symbol;Acc:HGNC:28443]
ENSSSCG00000030002	C18orf21	chromosome 18 open reading frame 21 [Source:HGNC Symbol;Acc:HGNC:28802]
ENSSSCG00000035048	C1QBP	complement C1q binding protein [Source:HGNC Symbol;Acc:HGNC:1243]
ENSSSCG00000028869	CAND1	cullin associated and neddylation dissociated 1 [Source:HGNC Symbol;Acc:HGNC:30688]
ENSSSCG00000012253	CASK	calcium/calmodulin dependent serine protein kinase [Source:HGNC Symbol;Acc:HGNC:1497]
ENSSSCG00000011329	CCDC12	coiled-coil domain containing 12 [Source:HGNC Symbol;Acc:HGNC:28332]
ENSSSCG00000017352	CCDC43	coiled-coil domain containing 43 [Source:HGNC Symbol;Acc:HGNC:26472]
ENSSSCG00000025107	CCDC58	coiled-coil domain containing 58 [Source:HGNC Symbol;Acc:HGNC:31136]
ENSSSCG00000032343	CCL4	C-C motif chemokine ligand 4 [Source:NCBI gene;Acc:396668]
ENSSSCG00000012307	CCNB3	cyclin B3 [Source:HGNC Symbol;Acc:HGNC:18709]
ENSSSCG00000024696	CCNYL1	cyclin Y like 1 [Source:HGNC Symbol;Acc:HGNC:26868]
ENSSSCG00000004414	CD164	CD164 molecule [Source:HGNC Symbol;Acc:HGNC:1632]
ENSSSCG00000030197	CD2AP	CD2 associated protein [Source:HGNC Symbol;Acc:HGNC:14258]
ENSSSCG00000015405	CD36	CD36 molecule [Source:HGNC Symbol;Acc:HGNC:1663]
ENSSSCG00000032931	CDH6	cadherin 6 [Source:HGNC Symbol;Acc:HGNC:1765]
ENSSSCG00000010214	CDK1	cyclin dependent kinase 1 [Source:HGNC Symbol;Acc:HGNC:1722]
ENSSSCG00000037597	CDK2	cyclin dependent kinase 2 [Source:HGNC Symbol;Acc:HGNC:1771]
ENSSSCG00000017194	CDK3	cyclin dependent kinase 3 [Source:HGNC Symbol;Acc:HGNC:1772]
ENSSSCG00000028117	CDK5RAP2	CDK5 regulatory subunit associated protein 2 [Source:HGNC Symbol;Acc:HGNC:18672]
ENSSSCG00000032340	CDR2	cerebellar degeneration related protein 2 [Source:HGNC Symbol;Acc:HGNC:1799]
ENSSSCG00000000999	CDYL	chromodomain Y like [Source:HGNC Symbol;Acc:HGNC:1811]
ENSSSCG00000027007	CEP76	centrosomal protein 76 [Source:HGNC Symbol;Acc:HGNC:25727]
ENSSSCG00000012757	CETN2	centrin 2 [Source:HGNC Symbol;Acc:HGNC:1867]
ENSSSCG00000024500	CFAP410	cilia and flagella associated protein 410 [Source:HGNC Symbol;Acc:HGNC:1260]
ENSSSCG00000015215	CHEK1	checkpoint kinase 1 [Source:HGNC Symbol;Acc:HGNC:1925]
ENSSSCG00000022345	CHN1	chimerin 1 [Source:HGNC Symbol;Acc:HGNC:1943]
ENSSSCG00000001762	CIB2	calcium and integrin binding family member 2 [Source:HGNC Symbol;Acc:HGNC:24579]
ENSSSCG00000022187	CISD3	CDGSH iron sulfur domain 3 [Source:HGNC Symbol;Acc:HGNC:27578]
ENSSSCG00000006932	CLCA4	chloride channel accessory 4 [Source:HGNC Symbol;Acc:HGNC:2018]
ENSSSCG00000016464	CLCN1	chloride voltage-gated channel 1 [Source:HGNC Symbol;Acc:HGNC:2019]
ENSSSCG00000017934	CLDN7	claudin 7 [Source:HGNC Symbol;Acc:HGNC:2049]
ENSSSCG00000007719	CLIP2	CAP-Gly domain containing linker protein 2 [Source:HGNC Symbol;Acc:HGNC:2586]
ENSSSCG00000023155	CLN8	CLN8 transmembrane ER and ERGIC protein [Source:HGNC Symbol;Acc:HGNC:2079]
ENSSSCG00000003885	CMPK1	cytidine/uridine monophosphate kinase 1 [Source:HGNC Symbol;Acc:HGNC:18170]
ENSSSCG00000011234	CMTM7	CKLF like MARVEL transmembrane domain containing 7 [Source:HGNC Symbol;Acc:HGNC:19178]
ENSSSCG00000017248	COG1	component of oligomeric golgi complex 1 [Source:HGNC Symbol;Acc:HGNC:6545]
ENSSSCG00000001500	COL21A1	collagen type XXI alpha 1 chain [Source:HGNC Symbol;Acc:HGNC:17025]
ENSSSCG00000012571	COL4A6	collagen type IV alpha 6 chain [Source:HGNC Symbol;Acc:HGNC:2208]
ENSSSCG00000022506	COL6A1	collagen type VI alpha 1 chain [Source:HGNC Symbol;Acc:HGNC:2211]
ENSSSCG00000009241	COPS4	COP9 signalosome subunit 4 [Source:HGNC Symbol;Acc:HGNC:16702]
ENSSSCG00000016323	COPS8	COP9 signalosome subunit 8 [Source:HGNC Symbol;Acc:HGNC:24335]
ENSSSCG00000039618	COX20	cytochrome c oxidase assembly factor COX20 [Source:HGNC Symbol;Acc:HGNC:26970]
ENSSSCG00000032119	CRCP	CGRP receptor component [Source:HGNC Symbol;Acc:HGNC:17888]
ENSSSCG00000038989	CRK	CRK proto-oncogene, adaptor protein [Source:HGNC Symbol;Acc:HGNC:2362]
ENSSSCG00000035686	CS	citrate synthase [Source:HGNC Symbol;Acc:HGNC:2422]
ENSSSCG00000000951	CSRP2	cysteine and glycine rich protein 2 [Source:HGNC Symbol;Acc:HGNC:2470]
ENSSSCG00000027013	CYP4F8	cytochrome P450 family 4 subfamily F member 8 [Source:HGNC Symbol;Acc:HGNC:2648]
ENSSSCG00000021427	DCTN4	dynactin subunit 4 [Source:HGNC Symbol;Acc:HGNC:15518]
ENSSSCG00000007795	DCTPP1	dCTP pyrophosphatase 1 [Source:HGNC Symbol;Acc:HGNC:28777]
ENSSSCG00000001075	DEK	DEK proto-oncogene [Source:HGNC Symbol;Acc:HGNC:2768]
ENSSSCG00000009788	DENR	density regulated re-initiation and release factor [Source:HGNC Symbol;Acc:HGNC:2769]
ENSSSCG00000031530	DERL2	derlin 2 [Source:HGNC Symbol;Acc:HGNC:17943]
ENSSSCG00000017378	DHX8	DEAH-box helicase 8 [Source:HGNC Symbol;Acc:HGNC:2749]
ENSSSCG00000014387	DIAPH1	diaphanous related formin 1 [Source:HGNC Symbol;Acc:HGNC:2876]
ENSSSCG00000038969	DMPK	DM1 protein kinase [Source:HGNC Symbol;Acc:HGNC:2933]
ENSSSCG00000033272	DNAJB6	DnaJ heat shock protein family (Hsp40) member B6 [Source:HGNC Symbol;Acc:HGNC:14888]
ENSSSCG00000031524	DPPA2	developmental pluripotency associated 2 [Source:HGNC Symbol;Acc:HGNC:19197]
ENSSSCG00000004441	DSE	dermatan sulfate epimerase [Source:HGNC Symbol;Acc:HGNC:21144]
ENSSSCG00000040968	DUS3L	dihydrouridine synthase 3 like [Source:HGNC Symbol;Acc:HGNC:26920]
ENSSSCG00000033833	DUSP18	dual specificity phosphatase 18 [Source:HGNC Symbol;Acc:HGNC:18484]
ENSSSCG00000004489	EEF1A1	eukaryotic translation elongation factor 1 alpha 1 [Source:HGNC Symbol;Acc:HGNC:3189]
ENSSSCG00000013064	EEF1G	eukaryotic translation elongation factor 1 gamma [Source:HGNC Symbol;Acc:HGNC:3213]
ENSSSCG00000008496	EIF2AK2	eukaryotic translation initiation factor 2 alpha kinase 2 [Source:HGNC Symbol;Acc:HGNC:9437]
ENSSSCG00000009770	EIF2B1	eukaryotic translation initiation factor 2B subunit alpha [Source:HGNC Symbol;Acc:HGNC:3257]
ENSSSCG00000013661	EIF3G	eukaryotic translation initiation factor 3 subunit G [Source:HGNC Symbol;Acc:HGNC:3274]
ENSSSCG00000013315	EIF3M	eukaryotic translation initiation factor 3 subunit M [Source:HGNC Symbol;Acc:HGNC:24460]
ENSSSCG00000008061	ELOB	elongin B [Source:HGNC Symbol;Acc:HGNC:11619]
ENSSSCG00000005441	ELP1	elongator complex protein 1 [Source:HGNC Symbol;Acc:HGNC:5959]
ENSSSCG00000038646	ENAH	ENAH actin regulator [Source:HGNC Symbol;Acc:HGNC:18271]
ENSSSCG00000009246	ENOPH1	enolase-phosphatase 1 [Source:HGNC Symbol;Acc:HGNC:24599]
ENSSSCG00000031871	ENTPD4	ectonucleoside triphosphate diphosphohydrolase 4 [Source:HGNC Symbol;Acc:HGNC:14573]
ENSSSCG00000038444	ENY2	ENY2 transcription and export complex 2 subunit [Source:HGNC Symbol;Acc:HGNC:24449]
ENSSSCG00000020963	EPDR1	ependymin related 1 [Source:HGNC Symbol;Acc:HGNC:17572]
ENSSSCG00000033703	FAM111A	family with sequence similarity 111 member A [Source:HGNC Symbol;Acc:HGNC:24725]
ENSSSCG00000026196	FAM13A	family with sequence similarity 13 member A [Source:HGNC Symbol;Acc:HGNC:19367]
ENSSSCG00000010674	FAM204A	family with sequence similarity 204 member A [Source:HGNC Symbol;Acc:HGNC:25794]
ENSSSCG00000037963	FAM92A	family with sequence similarity 92 member A [Source:HGNC Symbol;Acc:HGNC:30452]
ENSSSCG00000004349	FAXC	failed axon connections homolog, metaxin like GST domain containing [Source:HGNC Symbol;Acc:HGNC:20742]
ENSSSCG00000023569	FBRSL1	fibrosin like 1 [Source:HGNC Symbol;Acc:HGNC:29308]
ENSSSCG00000038805	FBXO17	F-box protein 17 [Source:HGNC Symbol;Acc:HGNC:18754]
ENSSSCG00000024618	FBXO28	F-box protein 28 [Source:HGNC Symbol;Acc:HGNC:29046]
ENSSSCG00000027074	FER	FER tyrosine kinase [Source:HGNC Symbol;Acc:HGNC:3655]
ENSSSCG00000022331	FGF13	fibroblast growth factor 13 [Source:HGNC Symbol;Acc:HGNC:3670]
ENSSSCG00000012699	FHL1	four and a half LIM domains 1 [Source:HGNC Symbol;Acc:HGNC:3702]
ENSSSCG00000016509	FMC1-LUC7L2	FMC1-LUC7L2 readthrough [Source:HGNC Symbol;Acc:HGNC:44671]
ENSSSCG00000027675	FOXP1	forkhead box P1 [Source:HGNC Symbol;Acc:HGNC:3823]
ENSSSCG00000006996	FRG1	FSHD region gene 1 [Source:HGNC Symbol;Acc:HGNC:3954]
ENSSSCG00000003771	FUBP1	far upstream element binding protein 1 [Source:HGNC Symbol;Acc:HGNC:4004]
ENSSSCG00000037655	GABPA	GA binding protein transcription factor subunit alpha [Source:HGNC Symbol;Acc:HGNC:4071]
ENSSSCG00000006636	GABPB2	GA binding protein transcription factor subunit beta 2 [Source:HGNC Symbol;Acc:HGNC:28441]
ENSSSCG00000039056	GAS7	growth arrest specific 7 [Source:HGNC Symbol;Acc:HGNC:4169]
ENSSSCG00000033009	GCNT2	glucosaminyl (N-acetyl) transferase 2 (I blood group) [Source:HGNC Symbol;Acc:HGNC:4204]
ENSSSCG00000027826	GIMAP4	GTPase, IMAP family member 4 [Source:HGNC Symbol;Acc:HGNC:21872]
ENSSSCG00000034913	GINS1	GINS complex subunit 1 [Source:HGNC Symbol;Acc:HGNC:28980]
ENSSSCG00000005040	GNPNAT1	glucosamine-phosphate N-acetyltransferase 1 [Source:HGNC Symbol;Acc:HGNC:19980]
ENSSSCG00000036246	GP91-PHOX	NADPH oxidase heavy chain subunit [Source:NCBI gene;Acc:397108]
ENSSSCG00000028097	GPBP1L1	GC-rich promoter binding protein 1 like 1 [Source:HGNC Symbol;Acc:HGNC:28843]
ENSSSCG00000009489	GPC6	glypican 6 [Source:HGNC Symbol;Acc:HGNC:4454]
ENSSSCG00000012126	GPM6B	glycoprotein M6B [Source:HGNC Symbol;Acc:HGNC:4461]
ENSSSCG00000017940	GPS2	G protein pathway suppressor 2 [Source:HGNC Symbol;Acc:HGNC:4550]
ENSSSCG00000005901	GPT	glutamic--pyruvic transaminase [Source:HGNC Symbol;Acc:HGNC:4552]
ENSSSCG00000015305	GTPBP10	GTP binding protein 10 [Source:HGNC Symbol;Acc:HGNC:25106]
ENSSSCG00000027718	HAUS3	HAUS augmin like complex subunit 3 [Source:HGNC Symbol;Acc:HGNC:28719]
ENSSSCG00000012767	HAUS7	HAUS augmin like complex subunit 7 [Source:HGNC Symbol;Acc:HGNC:32979]
ENSSSCG00000011290	HIGD1A	HIG1 hypoxia inducible domain family member 1A [Source:HGNC Symbol;Acc:HGNC:29527]
ENSSSCG00000036350	HNRNPA2B1	heterogeneous nuclear ribonucleoprotein A2/B1 [Source:HGNC Symbol;Acc:HGNC:5033]
ENSSSCG00000035570	HNRNPL	heterogeneous nuclear ribonucleoprotein L [Source:HGNC Symbol;Acc:HGNC:5045]
ENSSSCG00000030049	HNRNPUL1	heterogeneous nuclear ribonucleoprotein U like 1 [Source:HGNC Symbol;Acc:HGNC:17011]
ENSSSCG00000024486	HOOK3	hook microtubule tethering protein 3 [Source:HGNC Symbol;Acc:HGNC:23576]
ENSSSCG00000034896	HPRT1	hypoxanthine phosphoribosyltransferase 1 [Source:HGNC Symbol;Acc:HGNC:5157]
ENSSSCG00000037358	HPS5	HPS5 biogenesis of lysosomal organelles complex 2 subunit 2 [Source:NCBI gene;Acc:100049701]
ENSSSCG00000000849	HSP90B1	heat shock protein 90 beta family member 1 [Source:HGNC Symbol;Acc:HGNC:12028]
ENSSSCG00000010703	HTRA1	HtrA serine peptidase 1 [Source:HGNC Symbol;Acc:HGNC:9476]
ENSSSCG00000024363	HYAL3	hyaluronidase 3 [Source:HGNC Symbol;Acc:HGNC:5322]
ENSSSCG00000023264	IDH1	isocitrate dehydrogenase (NADP(+)) 1, cytosolic [Source:HGNC Symbol;Acc:HGNC:5382]
ENSSSCG00000029066	IDI1	isopentenyl-diphosphate delta isomerase 1 [Source:HGNC Symbol;Acc:HGNC:5387]
ENSSSCG00000005768	IER3IP1	immediate early response 3 interacting protein 1 [Source:HGNC Symbol;Acc:HGNC:18550]
ENSSSCG00000023796	IL18BP	interleukin 18 binding protein [Source:HGNC Symbol;Acc:HGNC:5987]
ENSSSCG00000036229	INSIG2	insulin induced gene 2 [Source:HGNC Symbol;Acc:HGNC:20452]
ENSSSCG00000014258	ISOC1	isochorismatase domain containing 1 [Source:HGNC Symbol;Acc:HGNC:24254]
ENSSSCG00000002743	IST1	IST1 factor associated with ESCRT-III [Source:HGNC Symbol;Acc:HGNC:28977]
ENSSSCG00000017213	JPT1	Jupiter microtubule associated homolog 1 [Source:HGNC Symbol;Acc:HGNC:14569]
ENSSSCG00000009934	KCTD10	potassium channel tetramerization domain containing 10 [Source:HGNC Symbol;Acc:HGNC:23236]
ENSSSCG00000008058	KCTD5	potassium channel tetramerization domain containing 5 [Source:HGNC Symbol;Acc:HGNC:21423]
ENSSSCG00000014060	KIAA1191	KIAA1191 [Source:HGNC Symbol;Acc:HGNC:29209]
ENSSSCG00000016401	KIF1A	kinesin family member 1A [Source:HGNC Symbol;Acc:HGNC:888]
ENSSSCG00000004969	KIF23	kinesin family member 23 [Source:HGNC Symbol;Acc:HGNC:6392]
ENSSSCG00000005437	KLF4	Kruppel like factor 4 [Source:HGNC Symbol;Acc:HGNC:6348]
ENSSSCG00000015931	KLHL41	kelch like family member 41 [Source:HGNC Symbol;Acc:HGNC:16905]
ENSSSCG00000038469	KLHL7	kelch like family member 7 [Source:HGNC Symbol;Acc:HGNC:15646]
ENSSSCG00000002895	KMT2B	lysine methyltransferase 2B [Source:HGNC Symbol;Acc:HGNC:15840]
ENSSSCG00000025203	KNOP1	lysine rich nucleolar protein 1 [Source:HGNC Symbol;Acc:HGNC:34404]
ENSSSCG00000034284	LAIR1	leukocyte associated immunoglobulin like receptor 1 [Source:HGNC Symbol;Acc:HGNC:6477]
ENSSSCG00000034280	LARP1B	La ribonucleoprotein domain family member 1B [Source:HGNC Symbol;Acc:HGNC:24704]
ENSSSCG00000013366	LDHA	lactate dehydrogenase A [Source:HGNC Symbol;Acc:HGNC:6535]
ENSSSCG00000002898	LIN37	lin-37 DREAM MuvB core complex component [Source:HGNC Symbol;Acc:HGNC:33234]
ENSSSCG00000031580	LLPH	LLP homolog, long-term synaptic facilitation factor [Source:HGNC Symbol;Acc:HGNC:28229]
ENSSSCG00000005457	LPAR1	lysophosphatidic acid receptor 1 [Source:HGNC Symbol;Acc:HGNC:3166]
ENSSSCG00000008452	LRPPRC	leucine rich pentatricopeptide repeat containing [Source:HGNC Symbol;Acc:HGNC:15714]
ENSSSCG00000016330	LRRFIP1	LRR binding FLII interacting protein 1 [Source:HGNC Symbol;Acc:HGNC:6702]
ENSSSCG00000034314	LSM4	LSM4 homolog, U6 small nuclear RNA and mRNA degradation associated [Source:HGNC Symbol;Acc:HGNC:17259]
ENSSSCG00000012985	LTBP3	latent transforming growth factor beta binding protein 3 [Source:HGNC Symbol;Acc:HGNC:6716]
ENSSSCG00000017555	LUC7L3	LUC7 like 3 pre-mRNA splicing factor [Source:HGNC Symbol;Acc:HGNC:24309]
ENSSSCG00000013341	LUZP2	leucine zipper protein 2 [Source:HGNC Symbol;Acc:HGNC:23206]
ENSSSCG00000006260	LYPLA1	lysophospholipase 1 [Source:HGNC Symbol;Acc:HGNC:6737]
ENSSSCG00000003849	MAGOH	mago homolog, exon junction complex subunit [Source:HGNC Symbol;Acc:HGNC:6815]
ENSSSCG00000000635	MAGOHB	mago homolog B, exon junction complex subunit [Source:HGNC Symbol;Acc:HGNC:25504]
ENSSSCG00000008115	MAL	mal, T cell differentiation protein [Source:HGNC Symbol;Acc:HGNC:6817]
ENSSSCG00000010164	MAP3K21	mitogen-activated protein kinase kinase kinase 21 [Source:HGNC Symbol;Acc:HGNC:29798]
ENSSSCG00000007253	MAPRE1	microtubule associated protein RP/EB family member 1 [Source:HGNC Symbol;Acc:HGNC:6890]
ENSSSCG00000013435	MBD3	methyl-CpG binding domain protein 3 [Source:HGNC Symbol;Acc:HGNC:6918]
ENSSSCG00000015116	MCAM	melanoma cell adhesion molecule [Source:HGNC Symbol;Acc:HGNC:6934]
ENSSSCG00000013260	MDK	midkine [Source:HGNC Symbol;Acc:HGNC:6972]
ENSSSCG00000000483	MDM1	Mdm1 nuclear protein [Source:HGNC Symbol;Acc:HGNC:29917]
ENSSSCG00000028458	METTL5	methyltransferase like 5 [Source:HGNC Symbol;Acc:HGNC:25006]
ENSSSCG00000007089	MGME1	mitochondrial genome maintenance exonuclease 1 [Source:HGNC Symbol;Acc:HGNC:16205]
ENSSSCG00000014861	MOGAT2	monoacylglycerol O-acyltransferase 2 [Source:HGNC Symbol;Acc:HGNC:23248]
ENSSSCG00000017300	MRC2	mannose receptor C type 2 [Source:HGNC Symbol;Acc:HGNC:16875]
ENSSSCG00000027746	MRFAP1	Morf4 family associated protein 1 [Source:HGNC Symbol;Acc:HGNC:24549]
ENSSSCG00000030578	MRPL15	mitochondrial ribosomal protein L15 [Source:HGNC Symbol;Acc:HGNC:14054]
ENSSSCG00000034129	MRPL33	mitochondrial ribosomal protein L33 [Source:HGNC Symbol;Acc:HGNC:14487]
ENSSSCG00000027974	MRPL50	mitochondrial ribosomal protein L50 [Source:HGNC Symbol;Acc:HGNC:16654]
ENSSSCG00000040782	MRPS21	mitochondrial ribosomal protein S21 [Source:HGNC Symbol;Acc:HGNC:14046]
ENSSSCG00000013102	MS4A7	membrane spanning 4-domains A7 [Source:HGNC Symbol;Acc:HGNC:13378]
ENSSSCG00000011077	MSRB2	methionine sulfoxide reductase B2 [Source:HGNC Symbol;Acc:HGNC:17061]
ENSSSCG00000005135	MTAP	methylthioadenosine phosphorylase [Source:HGNC Symbol;Acc:HGNC:7413]
ENSSSCG00000003253	MYADM	myeloid associated differentiation marker [Source:HGNC Symbol;Acc:HGNC:7544]
ENSSSCG00000007288	MYH7B	myosin heavy chain 7B [Source:HGNC Symbol;Acc:HGNC:15906]
ENSSSCG00000003691	MYL12A	myosin light chain 12A [Source:HGNC Symbol;Acc:HGNC:16701]
ENSSSCG00000001063	MYLIP	myosin regulatory light chain interacting protein [Source:HGNC Symbol;Acc:HGNC:21155]
ENSSSCG00000002841	N4BP1	NEDD4 binding protein 1 [Source:HGNC Symbol;Acc:HGNC:29850]
ENSSSCG00000040566	N4BP2L1	NEDD4 binding protein 2 like 1 [Source:HGNC Symbol;Acc:HGNC:25037]
ENSSSCG00000011917	NAA50	N(alpha)-acetyltransferase 50, NatE catalytic subunit [Source:HGNC Symbol;Acc:HGNC:29533]
ENSSSCG00000014893	NARS2	asparaginyl-tRNA synthetase 2, mitochondrial [Source:HGNC Symbol;Acc:HGNC:26274]
ENSSSCG00000014371	NDUFA2	NADH:ubiquinone oxidoreductase subunit A2 [Source:HGNC Symbol;Acc:HGNC:7685]
ENSSSCG00000037869	NDUFA5	NADH:ubiquinone oxidoreductase subunit A5 [Source:HGNC Symbol;Acc:HGNC:7688]
ENSSSCG00000010795	NDUFAB1	NADH:ubiquinone oxidoreductase subunit AB1 [Source:HGNC Symbol;Acc:HGNC:7694]
ENSSSCG00000016100	NDUFB3	NADH:ubiquinone oxidoreductase subunit B3 [Source:HGNC Symbol;Acc:HGNC:7698]
ENSSSCG00000011764	NDUFB5	NADH:ubiquinone oxidoreductase subunit B5 [Source:HGNC Symbol;Acc:HGNC:7700]
ENSSSCG00000017766	NEK8	NIMA related kinase 8 [Source:HGNC Symbol;Acc:HGNC:13387]
ENSSSCG00000016053	NEMP2	nuclear envelope integral membrane protein 2 [Source:HGNC Symbol;Acc:HGNC:33700]
ENSSSCG00000025007	NFU1	NFU1 iron-sulfur cluster scaffold [Source:HGNC Symbol;Acc:HGNC:16287]
ENSSSCG00000036659	NIPSNAP2	nipsnap homolog 2 [Source:HGNC Symbol;Acc:HGNC:4179]
ENSSSCG00000031142	NMNAT3	nicotinamide nucleotide adenylyltransferase 3 [Source:HGNC Symbol;Acc:HGNC:20989]
ENSSSCG00000017144	NPTX1	neuronal pentraxin 1 [Source:HGNC Symbol;Acc:HGNC:7952]
ENSSSCG00000003211	NR1H2	nuclear receptor subfamily 1 group H member 2 [Source:HGNC Symbol;Acc:HGNC:7965]
ENSSSCG00000026180	NRXN1	neurexin 1 [Source:HGNC Symbol;Acc:HGNC:8008]
ENSSSCG00000014075	NSA2	NSA2 ribosome biogenesis factor [Source:HGNC Symbol;Acc:HGNC:30728]
ENSSSCG00000017316	NSF	N-ethylmaleimide sensitive factor, vesicle fusing ATPase [Source:HGNC Symbol;Acc:HGNC:8016]
ENSSSCG00000022912	NT5C3A	5'-nucleotidase, cytosolic IIIA [Source:HGNC Symbol;Acc:HGNC:17820]
ENSSSCG00000002697	NUDT7	nudix hydrolase 7 [Source:HGNC Symbol;Acc:HGNC:8054]
ENSSSCG00000009673	NUGGC	nuclear GTPase, germinal center associated [Source:HGNC Symbol;Acc:HGNC:33550]
ENSSSCG00000022178	NUMB	NUMB endocytic adaptor protein [Source:HGNC Symbol;Acc:HGNC:8060]
ENSSSCG00000030295	NUTF2	nuclear transport factor 2 [Source:HGNC Symbol;Acc:HGNC:13722]
ENSSSCG00000013874	OCEL1	occludin/ELL domain containing 1 [Source:HGNC Symbol;Acc:HGNC:26221]
ENSSSCG00000012403	OGT	O-linked N-acetylglucosamine (GlcNAc) transferase [Source:HGNC Symbol;Acc:HGNC:8127]
ENSSSCG00000027434	OLFM2	olfactomedin 2 [Source:HGNC Symbol;Acc:HGNC:17189]
ENSSSCG00000016044	ORMDL1	ORMDL sphingolipid biosynthesis regulator 1 [Source:HGNC Symbol;Acc:HGNC:16036]
ENSSSCG00000000365	ORMDL2	ORMDL sphingolipid biosynthesis regulator 2 [Source:HGNC Symbol;Acc:HGNC:16037]
ENSSSCG00000017518	OSBPL7	oxysterol binding protein like 7 [Source:HGNC Symbol;Acc:HGNC:16387]
ENSSSCG00000009145	OSTC	oligosaccharyltransferase complex non-catalytic subunit [Source:HGNC Symbol;Acc:HGNC:24448]
ENSSSCG00000000377	PA2G4	proliferation-associated 2G4 [Source:HGNC Symbol;Acc:HGNC:8550]
ENSSSCG00000007947	PAM16	presequence translocase associated motor 16 [Source:HGNC Symbol;Acc:HGNC:29679]
ENSSSCG00000002505	PAPOLA	poly(A) polymerase alpha [Source:HGNC Symbol;Acc:HGNC:14981]
ENSSSCG00000036083	PCGF5	polycomb group ring finger 5 [Source:HGNC Symbol;Acc:HGNC:28264]
ENSSSCG00000036491	PCNP	PEST proteolytic signal containing nuclear protein [Source:HGNC Symbol;Acc:HGNC:30023]
ENSSSCG00000011465	PDE12	phosphodiesterase 12 [Source:HGNC Symbol;Acc:HGNC:25386]
ENSSSCG00000023643	PDHA1	pyruvate dehydrogenase E1 alpha 1 subunit [Source:HGNC Symbol;Acc:HGNC:8806]
ENSSSCG00000010669	PDZD8	PDZ domain containing 8 [Source:HGNC Symbol;Acc:HGNC:26974]
ENSSSCG00000003326	PEG3	paternally expressed 3 [Source:HGNC Symbol;Acc:HGNC:8826]
ENSSSCG00000017983	PER1	period circadian regulator 1 [Source:HGNC Symbol;Acc:HGNC:8845]
ENSSSCG00000001505	PFDN6	prefoldin subunit 6 [Source:HGNC Symbol;Acc:HGNC:4926]
ENSSSCG00000010517	PGAM1	phosphoglycerate mutase 1 [Source:HGNC Symbol;Acc:HGNC:8888]
ENSSSCG00000013878	PGLS	6-phosphogluconolactonase [Source:HGNC Symbol;Acc:HGNC:8903]
ENSSSCG00000002844	PHKB	phosphorylase kinase regulatory subunit beta [Source:HGNC Symbol;Acc:HGNC:8927]
ENSSSCG00000034765	PIEZO2	piezo type mechanosensitive ion channel component 2 [Source:HGNC Symbol;Acc:HGNC:26270]
ENSSSCG00000008440	PIGF	phosphatidylinositol glycan anchor biosynthesis class F [Source:HGNC Symbol;Acc:HGNC:8962]
ENSSSCG00000009692	PINX1	PIN2 (TERF1) interacting telomerase inhibitor 1 [Source:HGNC Symbol;Acc:HGNC:30046]
ENSSSCG00000009967	PITPNB	phosphatidylinositol transfer protein beta [Source:HGNC Symbol;Acc:HGNC:9002]
ENSSSCG00000036741	PITX1	paired like homeodomain 1 [Source:HGNC Symbol;Acc:HGNC:9004]
ENSSSCG00000002688	PLCG2	phospholipase C gamma 2 [Source:HGNC Symbol;Acc:HGNC:9066]
ENSSSCG00000015826	PLPBP	pyridoxal phosphate binding protein [Source:HGNC Symbol;Acc:HGNC:9457]
ENSSSCG00000014004	PLPP2	phospholipid phosphatase 2 [Source:HGNC Symbol;Acc:HGNC:9230]
ENSSSCG00000007435	PLTP	phospholipid transfer protein [Source:HGNC Symbol;Acc:HGNC:9093]
ENSSSCG00000008352	PNO1	partner of NOB1 homolog [Source:HGNC Symbol;Acc:HGNC:32790]
ENSSSCG00000007031	POLB	DNA polymerase beta [Source:HGNC Symbol;Acc:HGNC:9174]
ENSSSCG00000016597	POT1	protection of telomeres 1 [Source:HGNC Symbol;Acc:HGNC:17284]
ENSSSCG00000004760	PPP1R14D	protein phosphatase 1 regulatory inhibitor subunit 14D [Source:HGNC Symbol;Acc:HGNC:14953]
ENSSSCG00000010301	PPP3CB	protein phosphatase 3 catalytic subunit beta [Source:HGNC Symbol;Acc:HGNC:9315]
ENSSSCG00000001433	PPT2	palmitoyl-protein thioesterase 2 [Source:HGNC Symbol;Acc:HGNC:9326]
ENSSSCG00000037307	PRC1	protein regulator of cytokinesis 1 [Source:HGNC Symbol;Acc:HGNC:9341]
ENSSSCG00000020710	PRDM2	PR/SET domain 2 [Source:HGNC Symbol;Acc:HGNC:9347]
ENSSSCG00000003914	PRDX1	peroxiredoxin 1 [Source:HGNC Symbol;Acc:HGNC:9352]
ENSSSCG00000000185	PRKAG1	protein kinase AMP-activated non-catalytic subunit gamma 1 [Source:HGNC Symbol;Acc:HGNC:9385]
ENSSSCG00000000273	PRR13	proline rich 13 [Source:HGNC Symbol;Acc:HGNC:24528]
ENSSSCG00000027777	PRRG1	proline rich and Gla domain 1 [Source:HGNC Symbol;Acc:HGNC:9469]
ENSSSCG00000013391	PSMA1	proteasome subunit alpha 1 [Source:HGNC Symbol;Acc:HGNC:9530]
ENSSSCG00000006830	PSMA5	proteasome subunit alpha 5 [Source:HGNC Symbol;Acc:HGNC:9534]
ENSSSCG00000001950	PSMA6	protein only RNase P catalytic subunit [Source:NCBI gene;Acc:100519610]
ENSSSCG00000006628	PSMD4	proteasome 26S subunit, non-ATPase 4 [Source:HGNC Symbol;Acc:HGNC:9561]
ENSSSCG00000036658	PSMD8	proteasome 26S subunit, non-ATPase 8 [Source:HGNC Symbol;Acc:HGNC:9566]
ENSSSCG00000002004	PSME2	proteasome activator subunit 2 [Source:HGNC Symbol;Acc:HGNC:9569]
ENSSSCG00000036988	PSMG4	proteasome assembly chaperone 4 [Source:HGNC Symbol;Acc:HGNC:21108]
ENSSSCG00000021738	PTPN2	protein tyrosine phosphatase non-receptor type 2 [Source:HGNC Symbol;Acc:HGNC:9650]
ENSSSCG00000002425	PTPN21	protein tyrosine phosphatase non-receptor type 21 [Source:HGNC Symbol;Acc:HGNC:9651]
ENSSSCG00000024567	PTPRH	protein tyrosine phosphatase receptor type H [Source:HGNC Symbol;Acc:HGNC:9672]
ENSSSCG00000015040	PTS	6-pyruvoyltetrahydropterin synthase [Source:HGNC Symbol;Acc:HGNC:9689]
ENSSSCG00000017038	PWWP2A	PWWP domain containing 2A [Source:HGNC Symbol;Acc:HGNC:29406]
ENSSSCG00000031796	RAB3C	RAB3C, member RAS oncogene family [Source:HGNC Symbol;Acc:HGNC:30269]
ENSSSCG00000033792	RAB40C	RAB40C, member RAS oncogene family [Source:HGNC Symbol;Acc:HGNC:18285]
ENSSSCG00000015499	RABGAP1L	RAB GTPase activating protein 1 like [Source:HGNC Symbol;Acc:HGNC:24663]
ENSSSCG00000005436	RAD23B	RAD23 homolog B, nucleotide excision repair protein [Source:HGNC Symbol;Acc:HGNC:9813]
ENSSSCG00000025672	RAVER2	ribonucleoprotein, PTB binding 2 [Source:HGNC Symbol;Acc:HGNC:25577]
ENSSSCG00000024419	RBBP8	RB binding protein 8, endonuclease [Source:HGNC Symbol;Acc:HGNC:9891]
ENSSSCG00000038581	RBIS	ribosomal biogenesis factor [Source:HGNC Symbol;Acc:HGNC:32235]
ENSSSCG00000028663	RBM25	RNA binding motif protein 25 [Source:HGNC Symbol;Acc:HGNC:23244]
ENSSSCG00000034614	RFT1	RFT1 homolog [Source:HGNC Symbol;Acc:HGNC:30220]
ENSSSCG00000005480	RGS3	regulator of G protein signaling 3 [Source:HGNC Symbol;Acc:HGNC:9999]
ENSSSCG00000031172	RNF11	ring finger protein 11 [Source:HGNC Symbol;Acc:HGNC:10056]
ENSSSCG00000039551	RNF126	ring finger protein 126 [Source:HGNC Symbol;Acc:HGNC:21151]
ENSSSCG00000037341	RNF220	ring finger protein 220 [Source:HGNC Symbol;Acc:HGNC:25552]
ENSSSCG00000017671	RNFT1	ring finger protein, transmembrane 1 [Source:HGNC Symbol;Acc:HGNC:30206]
ENSSSCG00000024974	RPL13	ribosomal protein L13 [Source:HGNC Symbol;Acc:HGNC:10303]
ENSSSCG00000037030	RPL15	ribosomal protein L15 [Source:HGNC Symbol;Acc:HGNC:10306]
ENSSSCG00000025928	RPL18	ribosomal protein L18 [Source:HGNC Symbol;Acc:HGNC:10310]
ENSSSCG00000017509	RPL19	ribosomal protein L19 [Source:HGNC Symbol;Acc:HGNC:10312]
ENSSSCG00000009303	RPL21	ribosomal protein L21 [Source:HGNC Symbol;Acc:HGNC:10313]
ENSSSCG00000035080	RPL23A	ribosomal protein L23a [Source:HGNC Symbol;Acc:HGNC:10317]
ENSSSCG00000011952	RPL24	ribosomal protein L24 [Source:HGNC Symbol;Acc:HGNC:10325]
ENSSSCG00000039460	RPL28	ribosomal protein L28 [Source:HGNC Symbol;Acc:HGNC:10330]
ENSSSCG00000027573	RPL29	ribosomal protein L29 [Source:HGNC Symbol;Acc:HGNC:10331]
ENSSSCG00000008170	RPL31	ribosomal protein L31 [Source:HGNC Symbol;Acc:HGNC:10334]
ENSSSCG00000039046	RPL36A-HNRNPH2	RPL36A-HNRNPH2 readthrough [Source:HGNC Symbol;Acc:HGNC:48349]
ENSSSCG00000017239	RPL38	ribosomal protein L38 [Source:HGNC Symbol;Acc:HGNC:10349]
ENSSSCG00000004945	RPL4	ribosomal protein L4 [Source:HGNC Symbol;Acc:HGNC:10353]
ENSSSCG00000035768	RPS15A	ribosomal protein S15a [Source:HGNC Symbol;Acc:HGNC:10389]
ENSSSCG00000033697	RPS2	ribosomal protein S2 [Source:HGNC Symbol;Acc:HGNC:10404]
ENSSSCG00000036296	RPS25	ribosomal protein S25 [Source:HGNC Symbol;Acc:HGNC:10413]
ENSSSCG00000023158	RPS27L	ribosomal protein S27 like [Source:HGNC Symbol;Acc:HGNC:18476]
ENSSSCG00000013597	RPS28	ribosomal protein S28 [Source:HGNC Symbol;Acc:HGNC:10418]
ENSSSCG00000014855	RPS3	ribosomal protein S3 [Source:HGNC Symbol;Acc:HGNC:10420]
ENSSSCG00000017670	RPS6KB1	ribosomal protein S6 kinase B1 [Source:HGNC Symbol;Acc:HGNC:10436]
ENSSSCG00000003930	RPS8	ribosomal protein S8 [Source:HGNC Symbol;Acc:HGNC:10441]
ENSSSCG00000027556	RSRC1	arginine and serine rich coiled-coil 1 [Source:HGNC Symbol;Acc:HGNC:24152]
ENSSSCG00000004446	RWDD1	RWD domain containing 1 [Source:HGNC Symbol;Acc:HGNC:20993]
ENSSSCG00000010706	SAMD4B	sterile alpha motif domain containing 4B [Source:HGNC Symbol;Acc:HGNC:25492]
ENSSSCG00000008836	SCFD2	sec1 family domain containing 2 [Source:HGNC Symbol;Acc:HGNC:30676]
ENSSSCG00000038550	SCOC	short coiled-coil protein [Source:HGNC Symbol;Acc:HGNC:20335]
ENSSSCG00000012984	SCYL1	SCY1 like pseudokinase 1 [Source:HGNC Symbol;Acc:HGNC:14372]
ENSSSCG00000008974	SDAD1	SDA1 domain containing 1 [Source:HGNC Symbol;Acc:HGNC:25537]
ENSSSCG00000036865	SDS	serine dehydratase [Source:HGNC Symbol;Acc:HGNC:10691]
ENSSSCG00000001934	SEC23A	Sec23 homolog A, coat complex II component [Source:HGNC Symbol;Acc:HGNC:10701]
ENSSSCG00000010306	SEC24C	SEC24 homolog C, COPII coat complex component [Source:HGNC Symbol;Acc:HGNC:10705]
ENSSSCG00000003554	SELENON	selenoprotein N [Source:HGNC Symbol;Acc:HGNC:15999]
ENSSSCG00000031659	SEPHS1	selenophosphate synthetase 1 [Source:HGNC Symbol;Acc:HGNC:19685]
ENSSSCG00000024263	SERF2	small EDRK-rich factor 2 [Source:NCBI gene;Acc:100154963]
ENSSSCG00000006665	SF3B4	splicing factor 3b subunit 4 [Source:HGNC Symbol;Acc:HGNC:10771]
ENSSSCG00000008722	SH3TC1	SH3 domain and tetratricopeptide repeats 1 [Source:HGNC Symbol;Acc:HGNC:26009]
ENSSSCG00000004674	SHF	Src homology 2 domain containing F [Source:HGNC Symbol;Acc:HGNC:25116]
ENSSSCG00000004518	SKA1	spindle and kinetochore associated complex subunit 1 [Source:HGNC Symbol;Acc:HGNC:28109]
ENSSSCG00000006382	SLAMF6	SLAM family member 6 [Source:HGNC Symbol;Acc:HGNC:21392]
ENSSSCG00000033037	SLC25A37	solute carrier family 25 member 37 [Source:HGNC Symbol;Acc:HGNC:29786]
ENSSSCG00000025316	SLC33A1	solute carrier family 33 member 1 [Source:HGNC Symbol;Acc:HGNC:95]
ENSSSCG00000003353	SLC35E2B	solute carrier family 35 member E2B [Source:HGNC Symbol;Acc:HGNC:33941]
ENSSSCG00000005092	SLC38A6	solute carrier family 38 member 6 [Source:HGNC Symbol;Acc:HGNC:19863]
ENSSSCG00000006490	SMG5	SMG5 nonsense mediated mRNA decay factor [Source:HGNC Symbol;Acc:HGNC:24644]
ENSSSCG00000033814	SMIM15	small integral membrane protein 15 [Source:HGNC Symbol;Acc:HGNC:33861]
ENSSSCG00000012166	SMS	spermine synthase [Source:HGNC Symbol;Acc:HGNC:11123]
ENSSSCG00000005184	SNAPC3	small nuclear RNA activating complex polypeptide 3 [Source:HGNC Symbol;Acc:HGNC:11136]
ENSSSCG00000023792	SNRNP70	small nuclear ribonucleoprotein U1 subunit 70 [Source:HGNC Symbol;Acc:HGNC:11150]
ENSSSCG00000040857	SNRPB	small nuclear ribonucleoprotein polypeptides B and B1 [Source:HGNC Symbol;Acc:HGNC:11153]
ENSSSCG00000033500	SNRPD2	small nuclear ribonucleoprotein D2 polypeptide [Source:HGNC Symbol;Acc:HGNC:11159]
ENSSSCG00000024776	SNRPG	small nuclear ribonucleoprotein polypeptide G [Source:HGNC Symbol;Acc:HGNC:11163]
ENSSSCG00000036956	SOCS3	suppressor of cytokine signaling 3 [Source:HGNC Symbol;Acc:HGNC:19391]
ENSSSCG00000032214	SOCS6	suppressor of cytokine signaling 6 [Source:HGNC Symbol;Acc:HGNC:16833]
ENSSSCG00000000199	SPATS2	spermatogenesis associated serine rich 2 [Source:HGNC Symbol;Acc:HGNC:18650]
ENSSSCG00000014850	SPCS2	signal peptidase complex subunit 2 [Source:HGNC Symbol;Acc:HGNC:28962]
ENSSSCG00000039769	SPIRE1	spire type actin nucleation factor 1 [Source:HGNC Symbol;Acc:HGNC:30622]
ENSSSCG00000017879	SPNS2	sphingolipid transporter 2 [Source:HGNC Symbol;Acc:HGNC:26992]
ENSSSCG00000008309	SPR	sepiapterin reductase [Source:HGNC Symbol;Acc:HGNC:11257]
ENSSSCG00000027689	SRM	spermidine synthase [Source:HGNC Symbol;Acc:HGNC:11296]
ENSSSCG00000031664	SRP9	signal recognition particle 9 [Source:HGNC Symbol;Acc:HGNC:11304]
ENSSSCG00000003348	SSU72	SSU72 homolog, RNA polymerase II CTD phosphatase [Source:HGNC Symbol;Acc:HGNC:25016]
ENSSSCG00000000071	ST13	ST13 Hsp70 interacting protein [Source:HGNC Symbol;Acc:HGNC:11343]
ENSSSCG00000006179	STAU2	staufen double-stranded RNA binding protein 2 [Source:HGNC Symbol;Acc:HGNC:11371]
ENSSSCG00000016758	STK17A	serine/threonine kinase 17a [Source:HGNC Symbol;Acc:HGNC:11395]
ENSSSCG00000008433	STPG4	sperm-tail PG-rich repeat containing 4 [Source:HGNC Symbol;Acc:HGNC:26850]
ENSSSCG00000036970	SUGP1	SURP and G-patch domain containing 1 [Source:HGNC Symbol;Acc:HGNC:18643]
ENSSSCG00000035795	SUMO3	small ubiquitin like modifier 3 [Source:HGNC Symbol;Acc:HGNC:11124]
ENSSSCG00000026389	SYNJ2BP	synaptojanin 2 binding protein [Source:HGNC Symbol;Acc:HGNC:18955]
ENSSSCG00000015434	SYPL1	synaptophysin like 1 [Source:HGNC Symbol;Acc:HGNC:11507]
ENSSSCG00000014909	SYTL2	synaptotagmin like 2 [Source:HGNC Symbol;Acc:HGNC:15585]
ENSSSCG00000031083	SZRD1	SUZ RNA binding domain containing 1 [Source:HGNC Symbol;Acc:HGNC:30232]
ENSSSCG00000037530	TACC2	transforming acidic coiled-coil containing protein 2 [Source:NCBI gene;Acc:100152804]
ENSSSCG00000029630	TAF10	TATA-box binding protein associated factor 10 [Source:HGNC Symbol;Acc:HGNC:11543]
ENSSSCG00000023126	TARDBP	TAR DNA binding protein [Source:HGNC Symbol;Acc:HGNC:11571]
ENSSSCG00000012523	TCEAL8	transcription elongation factor A like 8 [Source:HGNC Symbol;Acc:HGNC:28683]
ENSSSCG00000009926	TCHP	trichoplein keratin filament binding [Source:HGNC Symbol;Acc:HGNC:28135]
ENSSSCG00000015774	TENM3	teneurin transmembrane protein 3 [Source:HGNC Symbol;Acc:HGNC:29944]
ENSSSCG00000025106	THNSL2	threonine synthase like 2 [Source:HGNC Symbol;Acc:HGNC:25602]
ENSSSCG00000010685	TIAL1	TIA1 cytotoxic granule associated RNA binding protein like 1 [Source:HGNC Symbol;Acc:HGNC:11804]
ENSSSCG00000037431	TIMM17A	translocase of inner mitochondrial membrane 17A [Source:HGNC Symbol;Acc:HGNC:17315]
ENSSSCG00000001994	TINF2	TERF1 interacting nuclear factor 2 [Source:HGNC Symbol;Acc:HGNC:11824]
ENSSSCG00000000906	TMCC3	transmembrane and coiled-coil domain family 3 [Source:HGNC Symbol;Acc:HGNC:29199]
ENSSSCG00000028397	TMEM106C	transmembrane protein 106C [Source:HGNC Symbol;Acc:HGNC:28775]
ENSSSCG00000015473	TMEM183A	transmembrane protein 183A [Source:HGNC Symbol;Acc:HGNC:20173]
ENSSSCG00000002790	TMEM208	transmembrane protein 208 [Source:HGNC Symbol;Acc:HGNC:25015]
ENSSSCG00000038711	TMEM223	transmembrane protein 223 [Source:HGNC Symbol;Acc:HGNC:28464]
ENSSSCG00000025921	TMEM41A	transmembrane protein 41A [Source:HGNC Symbol;Acc:HGNC:30544]
ENSSSCG00000013911	TMEM59L	transmembrane protein 59 like [Source:HGNC Symbol;Acc:HGNC:13237]
ENSSSCG00000012119	TMSB4X	thymosin beta 4 X-linked [Source:HGNC Symbol;Acc:HGNC:11881]
ENSSSCG00000013176	TMX2	thioredoxin related transmembrane protein 2 [Source:HGNC Symbol;Acc:HGNC:30739]
ENSSSCG00000010158	TOMM20	translocase of outer mitochondrial membrane 20 [Source:HGNC Symbol;Acc:HGNC:20947]
ENSSSCG00000007355	TOP1	DNA topoisomerase I [Source:HGNC Symbol;Acc:HGNC:11986]
ENSSSCG00000026953	TPGS2	tubulin polyglutamylase complex subunit 2 [Source:HGNC Symbol;Acc:HGNC:24561]
ENSSSCG00000016949	TRAPPC13	trafficking protein particle complex 13 [Source:HGNC Symbol;Acc:HGNC:25828]
ENSSSCG00000017199	TRIM47	tripartite motif containing 47 [Source:HGNC Symbol;Acc:HGNC:19020]
ENSSSCG00000020777	TRIOBP	TRIO and F-actin binding protein [Source:HGNC Symbol;Acc:HGNC:17009]
ENSSSCG00000003667	TRIT1	tRNA isopentenyltransferase 1 [Source:HGNC Symbol;Acc:HGNC:20286]
ENSSSCG00000031121	TSEN15	tRNA splicing endonuclease subunit 15 [Source:HGNC Symbol;Acc:HGNC:16791]
ENSSSCG00000040528	TTC1	tetratricopeptide repeat domain 1 [Source:HGNC Symbol;Acc:HGNC:12391]
ENSSSCG00000014165	TTC37	tetratricopeptide repeat domain 37 [Source:HGNC Symbol;Acc:HGNC:23639]
ENSSSCG00000011506	UBA3	ubiquitin like modifier activating enzyme 3 [Source:HGNC Symbol;Acc:HGNC:12470]
ENSSSCG00000023603	UBALD1	UBA like domain containing 1 [Source:HGNC Symbol;Acc:HGNC:29576]
ENSSSCG00000033987	UBE2E3	ubiquitin conjugating enzyme E2 E3 [Source:HGNC Symbol;Acc:HGNC:12479]
ENSSSCG00000023331	UBL5	ubiquitin like 5 [Source:HGNC Symbol;Acc:HGNC:13736]
ENSSSCG00000006363	UFC1	ubiquitin-fold modifier conjugating enzyme 1 [Source:HGNC Symbol;Acc:HGNC:26941]
ENSSSCG00000005201	UHRF2	ubiquitin like with PHD and ring finger domains 2 [Source:HGNC Symbol;Acc:HGNC:12557]
ENSSSCG00000011117	UPF2	UPF2 regulator of nonsense mediated mRNA decay [Source:HGNC Symbol;Acc:HGNC:17854]
ENSSSCG00000027085	UQCRFS1	ubiquinol-cytochrome c reductase, Rieske iron-sulfur polypeptide 1 [Source:HGNC Symbol;Acc:HGNC:12587]
ENSSSCG00000040220	USP33	ubiquitin specific peptidase 33 [Source:HGNC Symbol;Acc:HGNC:20059]
ENSSSCG00000023187	VAV3	vav guanine nucleotide exchange factor 3 [Source:HGNC Symbol;Acc:HGNC:12659]
ENSSSCG00000012811	VBP1	VHL binding protein 1 [Source:HGNC Symbol;Acc:HGNC:12662]
ENSSSCG00000014296	VDAC1	voltage dependent anion channel 1 [Source:HGNC Symbol;Acc:HGNC:12669]
ENSSSCG00000010320	VDAC2	voltage dependent anion channel 2 [Source:HGNC Symbol;Acc:HGNC:12672]
ENSSSCG00000035364	VKORC1	vitamin K epoxide reductase complex subunit 1 [Source:HGNC Symbol;Acc:HGNC:23663]
ENSSSCG00000005282	VPS13A	vacuolar protein sorting 13 homolog A [Source:HGNC Symbol;Acc:HGNC:1908]
ENSSSCG00000006984	VPS37A	VPS37A subunit of ESCRT-I [Source:HGNC Symbol;Acc:HGNC:24928]
ENSSSCG00000013721	WDR83OS	WD repeat domain 83 opposite strand [Source:HGNC Symbol;Acc:HGNC:30203]
ENSSSCG00000013411	WEE1	WEE1 G2 checkpoint kinase [Source:HGNC Symbol;Acc:HGNC:12761]
ENSSSCG00000000759	WNT5B	Wnt family member 5B [Source:HGNC Symbol;Acc:HGNC:16265]
ENSSSCG00000017949	WRAP53	WD repeat containing antisense to TP53 [Source:HGNC Symbol;Acc:HGNC:25522]
ENSSSCG00000001010	WRNIP1	WRN helicase interacting protein 1 [Source:HGNC Symbol;Acc:HGNC:20876]
ENSSSCG00000025028	XIAP	X-linked inhibitor of apoptosis [Source:HGNC Symbol;Acc:HGNC:592]
ENSSSCG00000011678	XRN1	5'-3' exoribonuclease 1 [Source:HGNC Symbol;Acc:HGNC:30654]
ENSSSCG00000027429	YARS2	tyrosyl-tRNA synthetase 2 [Source:HGNC Symbol;Acc:HGNC:24249]
ENSSSCG00000028485	YBX1	Y-box binding protein 1 [Source:HGNC Symbol;Acc:HGNC:8014]
ENSSSCG00000007692	YWHAG	tyrosine 3-monooxygenase/tryptophan 5-monooxygenase activation protein gamma [Source:HGNC Symbol;Acc:HGNC:12852]
ENSSSCG00000003110	ZC3H4	zinc finger CCCH-type containing 4 [Source:HGNC Symbol;Acc:HGNC:17808]
ENSSSCG00000009792	ZCCHC8	zinc finger CCHC-type containing 8 [Source:HGNC Symbol;Acc:HGNC:25265]
ENSSSCG00000010519	ZDHHC16	zinc finger DHHC-type containing 16 [Source:HGNC Symbol;Acc:HGNC:20714]
ENSSSCG00000001779	ZFAND6	zinc finger AN1-type containing 6 [Source:HGNC Symbol;Acc:HGNC:30164]
ENSSSCG00000007454	ZMYND8	zinc finger MYND-type containing 8 [Source:HGNC Symbol;Acc:HGNC:9397]
ENSSSCG00000031166	ZNF296	zinc finger protein 296 [Source:HGNC Symbol;Acc:HGNC:15981]
ENSSSCG00000034301	ZNF304	zinc finger protein 304 [Source:HGNC Symbol;Acc:HGNC:13505]

## Sheet: Supplementary table 3 (jejunum)
Unidentified ID	gProfiler converted name	gProfiler_description
ENSSSCG00000031367	AADAC	arylacetamide deacetylase [Source:HGNC Symbol;Acc:HGNC:17]
ENSSSCG00000002723	AARS	alanyl-tRNA synthetase [Source:HGNC Symbol;Acc:HGNC:20]
ENSSSCG00000004145	ABRACL	ABRA C-terminal like [Source:HGNC Symbol;Acc:HGNC:21230]
ENSSSCG00000011064	ACBD5	acyl-CoA binding domain containing 5 [Source:HGNC Symbol;Acc:HGNC:23338]
ENSSSCG00000015710	ACTR3	actin related protein 3 [Source:HGNC Symbol;Acc:HGNC:170]
ENSSSCG00000001725	ADGRF5	adhesion G protein-coupled receptor F5 [Source:HGNC Symbol;Acc:HGNC:19030]
ENSSSCG00000023595	AK3	adenylate kinase 3 [Source:HGNC Symbol;Acc:HGNC:17376]
ENSSSCG00000009430	AKAP11	A-kinase anchoring protein 11 [Source:HGNC Symbol;Acc:HGNC:369]
ENSSSCG00000004307	AKIRIN2	akirin 2 [Source:HGNC Symbol;Acc:HGNC:21407]
ENSSSCG00000011147	AKR1C2	aldo-keto reductase family 1, member C1 [Source:NCBI gene;Acc:733634]
ENSSSCG00000031348	ALPK1	alpha kinase 1 [Source:HGNC Symbol;Acc:HGNC:20917]
ENSSSCG00000004392	AMD1	adenosylmethionine decarboxylase 1 [Source:HGNC Symbol;Acc:HGNC:457]
ENSSSCG00000028633	AMMECR1L	AMMECR1 like [Source:HGNC Symbol;Acc:HGNC:28658]
ENSSSCG00000016212	ANKZF1	ankyrin repeat and zinc finger peptidyl tRNA hydrolase 1 [Source:HGNC Symbol;Acc:HGNC:25527]
ENSSSCG00000009128	AP1AR	adaptor related protein complex 1 associated regulatory protein [Source:HGNC Symbol;Acc:HGNC:28808]
ENSSSCG00000013492	APBA3	amyloid beta precursor protein binding family A member 3 [Source:HGNC Symbol;Acc:HGNC:580]
ENSSSCG00000040060	APEX1	apurinic/apyrimidinic endodeoxyribonuclease 1 [Source:HGNC Symbol;Acc:HGNC:587]
ENSSSCG00000012348	APEX2	apurinic/apyrimidinic endodeoxyribonuclease 2 [Source:HGNC Symbol;Acc:HGNC:17889]
ENSSSCG00000032949	APH1B	aph-1 homolog B, gamma-secretase subunit [Source:HGNC Symbol;Acc:HGNC:24080]
ENSSSCG00000012459	APOOL	apolipoprotein O like [Source:HGNC Symbol;Acc:HGNC:24009]
ENSSSCG00000013992	ARF1	ADP ribosylation factor 1 [Source:HGNC Symbol;Acc:HGNC:652]
ENSSSCG00000027565	ARHGAP45	Rho GTPase activating protein 45 [Source:HGNC Symbol;Acc:HGNC:17102]
ENSSSCG00000032216	ATMIN	ATM interactor [Source:HGNC Symbol;Acc:HGNC:29034]
ENSSSCG00000016990	ATP6V0E1	ATPase H+ transporting V0 subunit e1 [Source:HGNC Symbol;Acc:HGNC:863]
ENSSSCG00000038657	ATPAF1	ATP synthase mitochondrial F1 complex assembly factor 1 [Source:HGNC Symbol;Acc:HGNC:18803]
ENSSSCG00000021774	B3GALNT1	beta-1,3-N-acetylgalactosaminyltransferase 1 (globoside blood group) [Source:HGNC Symbol;Acc:HGNC:918]
ENSSSCG00000027229	B3GNTL1	UDP-GlcNAc:betaGal beta-1,3-N-acetylglucosaminyltransferase like 1 [Source:HGNC Symbol;Acc:HGNC:21727]
ENSSSCG00000006360	B4GALT3	beta-1,4-galactosyltransferase 3 [Source:HGNC Symbol;Acc:HGNC:926]
ENSSSCG00000031073	BABAM1	BRISC and BRCA1 A complex member 1 [Source:HGNC Symbol;Acc:HGNC:25008]
ENSSSCG00000012961	BANF1	barrier to autointegration factor 1 [Source:HGNC Symbol;Acc:HGNC:17397]
ENSSSCG00000022361	BANK1	B cell scaffold protein with ankyrin repeats 1 [Source:HGNC Symbol;Acc:HGNC:18233]
ENSSSCG00000017927	BCL6B	BCL6B transcription repressor [Source:HGNC Symbol;Acc:HGNC:1002]
ENSSSCG00000017796	BLMH	bleomycin hydrolase [Source:HGNC Symbol;Acc:HGNC:1059]
ENSSSCG00000014327	BRD8	bromodomain containing 8 [Source:HGNC Symbol;Acc:HGNC:19874]
ENSSSCG00000012014	BTG3	BTG anti-proliferation factor 3 [Source:HGNC Symbol;Acc:HGNC:1132]
ENSSSCG00000040426	C10orf143	chromosome 10 open reading frame 143 [Source:HGNC Symbol;Acc:HGNC:48677]
ENSSSCG00000015027	C11orf1	chromosome 11 open reading frame 1 [Source:HGNC Symbol;Acc:HGNC:1163]
ENSSSCG00000023323	C11orf98	chromosome 11 open reading frame 98 [Source:HGNC Symbol;Acc:HGNC:51238]
ENSSSCG00000030131	C15orf40	chromosome 15 open reading frame 40 [Source:HGNC Symbol;Acc:HGNC:28443]
ENSSSCG00000030002	C18orf21	chromosome 18 open reading frame 21 [Source:HGNC Symbol;Acc:HGNC:28802]
ENSSSCG00000035048	C1QBP	complement C1q binding protein [Source:HGNC Symbol;Acc:HGNC:1243]
ENSSSCG00000028869	CAND1	cullin associated and neddylation dissociated 1 [Source:HGNC Symbol;Acc:HGNC:30688]
ENSSSCG00000012253	CASK	calcium/calmodulin dependent serine protein kinase [Source:HGNC Symbol;Acc:HGNC:1497]
ENSSSCG00000011329	CCDC12	coiled-coil domain containing 12 [Source:HGNC Symbol;Acc:HGNC:28332]
ENSSSCG00000017352	CCDC43	coiled-coil domain containing 43 [Source:HGNC Symbol;Acc:HGNC:26472]
ENSSSCG00000025107	CCDC58	coiled-coil domain containing 58 [Source:HGNC Symbol;Acc:HGNC:31136]
ENSSSCG00000032343	CCL4	C-C motif chemokine ligand 4 [Source:NCBI gene;Acc:396668]
ENSSSCG00000012307	CCNB3	cyclin B3 [Source:HGNC Symbol;Acc:HGNC:18709]
ENSSSCG00000024696	CCNYL1	cyclin Y like 1 [Source:HGNC Symbol;Acc:HGNC:26868]
ENSSSCG00000004414	CD164	CD164 molecule [Source:HGNC Symbol;Acc:HGNC:1632]
ENSSSCG00000030197	CD2AP	CD2 associated protein [Source:HGNC Symbol;Acc:HGNC:14258]
ENSSSCG00000015405	CD36	CD36 molecule [Source:HGNC Symbol;Acc:HGNC:1663]
ENSSSCG00000032931	CDH6	cadherin 6 [Source:HGNC Symbol;Acc:HGNC:1765]
ENSSSCG00000010214	CDK1	cyclin dependent kinase 1 [Source:HGNC Symbol;Acc:HGNC:1722]
ENSSSCG00000037597	CDK2	cyclin dependent kinase 2 [Source:HGNC Symbol;Acc:HGNC:1771]
ENSSSCG00000017194	CDK3	cyclin dependent kinase 3 [Source:HGNC Symbol;Acc:HGNC:1772]
ENSSSCG00000032340	CDR2	cerebellar degeneration related protein 2 [Source:HGNC Symbol;Acc:HGNC:1799]
ENSSSCG00000000999	CDYL	chromodomain Y like [Source:HGNC Symbol;Acc:HGNC:1811]
ENSSSCG00000027007	CEP76	centrosomal protein 76 [Source:HGNC Symbol;Acc:HGNC:25727]
ENSSSCG00000012757	CETN2	centrin 2 [Source:HGNC Symbol;Acc:HGNC:1867]
ENSSSCG00000024500	CFAP410	cilia and flagella associated protein 410 [Source:HGNC Symbol;Acc:HGNC:1260]
ENSSSCG00000015215	CHEK1	checkpoint kinase 1 [Source:HGNC Symbol;Acc:HGNC:1925]
ENSSSCG00000022187	CISD3	CDGSH iron sulfur domain 3 [Source:HGNC Symbol;Acc:HGNC:27578]
ENSSSCG00000006932	CLCA4	chloride channel accessory 4 [Source:HGNC Symbol;Acc:HGNC:2018]
ENSSSCG00000016464	CLCN1	chloride voltage-gated channel 1 [Source:HGNC Symbol;Acc:HGNC:2019]
ENSSSCG00000017934	CLDN7	claudin 7 [Source:HGNC Symbol;Acc:HGNC:2049]
ENSSSCG00000007719	CLIP2	CAP-Gly domain containing linker protein 2 [Source:HGNC Symbol;Acc:HGNC:2586]
ENSSSCG00000023155	CLN8	CLN8 transmembrane ER and ERGIC protein [Source:HGNC Symbol;Acc:HGNC:2079]
ENSSSCG00000003885	CMPK1	cytidine/uridine monophosphate kinase 1 [Source:HGNC Symbol;Acc:HGNC:18170]
ENSSSCG00000011234	CMTM7	CKLF like MARVEL transmembrane domain containing 7 [Source:HGNC Symbol;Acc:HGNC:19178]
ENSSSCG00000017248	COG1	component of oligomeric golgi complex 1 [Source:HGNC Symbol;Acc:HGNC:6545]
ENSSSCG00000012571	COL4A6	collagen type IV alpha 6 chain [Source:HGNC Symbol;Acc:HGNC:2208]
ENSSSCG00000022506	COL6A1	collagen type VI alpha 1 chain [Source:HGNC Symbol;Acc:HGNC:2211]
ENSSSCG00000009241	COPS4	COP9 signalosome subunit 4 [Source:HGNC Symbol;Acc:HGNC:16702]
ENSSSCG00000016323	COPS8	COP9 signalosome subunit 8 [Source:HGNC Symbol;Acc:HGNC:24335]
ENSSSCG00000039618	COX20	cytochrome c oxidase assembly factor COX20 [Source:HGNC Symbol;Acc:HGNC:26970]
ENSSSCG00000032119	CRCP	CGRP receptor component [Source:HGNC Symbol;Acc:HGNC:17888]
ENSSSCG00000038989	CRK	CRK proto-oncogene, adaptor protein [Source:HGNC Symbol;Acc:HGNC:2362]
ENSSSCG00000035686	CS	citrate synthase [Source:HGNC Symbol;Acc:HGNC:2422]
ENSSSCG00000000951	CSRP2	cysteine and glycine rich protein 2 [Source:HGNC Symbol;Acc:HGNC:2470]
ENSSSCG00000035347	CYP2C42	cytochrome P450 C42 [Source:NCBI gene;Acc:403111]
ENSSSCG00000027013	CYP4F8	cytochrome P450 family 4 subfamily F member 8 [Source:HGNC Symbol;Acc:HGNC:2648]
ENSSSCG00000021427	DCTN4	dynactin subunit 4 [Source:HGNC Symbol;Acc:HGNC:15518]
ENSSSCG00000007795	DCTPP1	dCTP pyrophosphatase 1 [Source:HGNC Symbol;Acc:HGNC:28777]
ENSSSCG00000001075	DEK	DEK proto-oncogene [Source:HGNC Symbol;Acc:HGNC:2768]
ENSSSCG00000009788	DENR	density regulated re-initiation and release factor [Source:HGNC Symbol;Acc:HGNC:2769]
ENSSSCG00000031530	DERL2	derlin 2 [Source:HGNC Symbol;Acc:HGNC:17943]
ENSSSCG00000017378	DHX8	DEAH-box helicase 8 [Source:HGNC Symbol;Acc:HGNC:2749]
ENSSSCG00000014387	DIAPH1	diaphanous related formin 1 [Source:HGNC Symbol;Acc:HGNC:2876]
ENSSSCG00000038969	DMPK	DM1 protein kinase [Source:HGNC Symbol;Acc:HGNC:2933]
ENSSSCG00000033272	DNAJB6	DnaJ heat shock protein family (Hsp40) member B6 [Source:HGNC Symbol;Acc:HGNC:14888]
ENSSSCG00000004441	DSE	dermatan sulfate epimerase [Source:HGNC Symbol;Acc:HGNC:21144]
ENSSSCG00000040968	DUS3L	dihydrouridine synthase 3 like [Source:HGNC Symbol;Acc:HGNC:26920]
ENSSSCG00000033833	DUSP18	dual specificity phosphatase 18 [Source:HGNC Symbol;Acc:HGNC:18484]
ENSSSCG00000004489	EEF1A1	eukaryotic translation elongation factor 1 alpha 1 [Source:HGNC Symbol;Acc:HGNC:3189]
ENSSSCG00000013064	EEF1G	eukaryotic translation elongation factor 1 gamma [Source:HGNC Symbol;Acc:HGNC:3213]
ENSSSCG00000008496	EIF2AK2	eukaryotic translation initiation factor 2 alpha kinase 2 [Source:HGNC Symbol;Acc:HGNC:9437]
ENSSSCG00000009770	EIF2B1	eukaryotic translation initiation factor 2B subunit alpha [Source:HGNC Symbol;Acc:HGNC:3257]
ENSSSCG00000013661	EIF3G	eukaryotic translation initiation factor 3 subunit G [Source:HGNC Symbol;Acc:HGNC:3274]
ENSSSCG00000013315	EIF3M	eukaryotic translation initiation factor 3 subunit M [Source:HGNC Symbol;Acc:HGNC:24460]
ENSSSCG00000008061	ELOB	elongin B [Source:HGNC Symbol;Acc:HGNC:11619]
ENSSSCG00000005441	ELP1	elongator complex protein 1 [Source:HGNC Symbol;Acc:HGNC:5959]
ENSSSCG00000038646	ENAH	ENAH actin regulator [Source:HGNC Symbol;Acc:HGNC:18271]
ENSSSCG00000009246	ENOPH1	enolase-phosphatase 1 [Source:HGNC Symbol;Acc:HGNC:24599]
ENSSSCG00000031871	ENTPD4	ectonucleoside triphosphate diphosphohydrolase 4 [Source:HGNC Symbol;Acc:HGNC:14573]
ENSSSCG00000038444	ENY2	ENY2 transcription and export complex 2 subunit [Source:HGNC Symbol;Acc:HGNC:24449]
ENSSSCG00000020963	EPDR1	ependymin related 1 [Source:HGNC Symbol;Acc:HGNC:17572]
ENSSSCG00000033703	FAM111A	family with sequence similarity 111 member A [Source:HGNC Symbol;Acc:HGNC:24725]
ENSSSCG00000026196	FAM13A	family with sequence similarity 13 member A [Source:HGNC Symbol;Acc:HGNC:19367]
ENSSSCG00000010674	FAM204A	family with sequence similarity 204 member A [Source:HGNC Symbol;Acc:HGNC:25794]
ENSSSCG00000004349	FAXC	failed axon connections homolog, metaxin like GST domain containing [Source:HGNC Symbol;Acc:HGNC:20742]
ENSSSCG00000023569	FBRSL1	fibrosin like 1 [Source:HGNC Symbol;Acc:HGNC:29308]
ENSSSCG00000038805	FBXO17	F-box protein 17 [Source:HGNC Symbol;Acc:HGNC:18754]
ENSSSCG00000024618	FBXO28	F-box protein 28 [Source:HGNC Symbol;Acc:HGNC:29046]
ENSSSCG00000027074	FER	FER tyrosine kinase [Source:HGNC Symbol;Acc:HGNC:3655]
ENSSSCG00000012699	FHL1	four and a half LIM domains 1 [Source:HGNC Symbol;Acc:HGNC:3702]
ENSSSCG00000016509	FMC1-LUC7L2	FMC1-LUC7L2 readthrough [Source:HGNC Symbol;Acc:HGNC:44671]
ENSSSCG00000027675	FOXP1	forkhead box P1 [Source:HGNC Symbol;Acc:HGNC:3823]
ENSSSCG00000038904	FRAT2	FRAT regulator of WNT signaling pathway 2 [Source:HGNC Symbol;Acc:HGNC:16048]
ENSSSCG00000006996	FRG1	FSHD region gene 1 [Source:HGNC Symbol;Acc:HGNC:3954]
ENSSSCG00000003771	FUBP1	far upstream element binding protein 1 [Source:HGNC Symbol;Acc:HGNC:4004]
ENSSSCG00000037655	GABPA	GA binding protein transcription factor subunit alpha [Source:HGNC Symbol;Acc:HGNC:4071]
ENSSSCG00000006636	GABPB2	GA binding protein transcription factor subunit beta 2 [Source:HGNC Symbol;Acc:HGNC:28441]
ENSSSCG00000039056	GAS7	growth arrest specific 7 [Source:HGNC Symbol;Acc:HGNC:4169]
ENSSSCG00000033009	GCNT2	glucosaminyl (N-acetyl) transferase 2 (I blood group) [Source:HGNC Symbol;Acc:HGNC:4204]
ENSSSCG00000027826	GIMAP4	GTPase, IMAP family member 4 [Source:HGNC Symbol;Acc:HGNC:21872]
ENSSSCG00000034913	GINS1	GINS complex subunit 1 [Source:HGNC Symbol;Acc:HGNC:28980]
ENSSSCG00000005040	GNPNAT1	glucosamine-phosphate N-acetyltransferase 1 [Source:HGNC Symbol;Acc:HGNC:19980]
ENSSSCG00000028097	GPBP1L1	GC-rich promoter binding protein 1 like 1 [Source:HGNC Symbol;Acc:HGNC:28843]
ENSSSCG00000009489	GPC6	glypican 6 [Source:HGNC Symbol;Acc:HGNC:4454]
ENSSSCG00000012126	GPM6B	glycoprotein M6B [Source:HGNC Symbol;Acc:HGNC:4461]
ENSSSCG00000017940	GPS2	G protein pathway suppressor 2 [Source:HGNC Symbol;Acc:HGNC:4550]
ENSSSCG00000005901	GPT	glutamic--pyruvic transaminase [Source:HGNC Symbol;Acc:HGNC:4552]
ENSSSCG00000015305	GTPBP10	GTP binding protein 10 [Source:HGNC Symbol;Acc:HGNC:25106]
ENSSSCG00000027718	HAUS3	HAUS augmin like complex subunit 3 [Source:HGNC Symbol;Acc:HGNC:28719]
ENSSSCG00000012767	HAUS7	HAUS augmin like complex subunit 7 [Source:HGNC Symbol;Acc:HGNC:32979]
ENSSSCG00000011290	HIGD1A	HIG1 hypoxia inducible domain family member 1A [Source:HGNC Symbol;Acc:HGNC:29527]
ENSSSCG00000036350	HNRNPA2B1	heterogeneous nuclear ribonucleoprotein A2/B1 [Source:HGNC Symbol;Acc:HGNC:5033]
ENSSSCG00000035570	HNRNPL	heterogeneous nuclear ribonucleoprotein L [Source:HGNC Symbol;Acc:HGNC:5045]
ENSSSCG00000030049	HNRNPUL1	heterogeneous nuclear ribonucleoprotein U like 1 [Source:HGNC Symbol;Acc:HGNC:17011]
ENSSSCG00000024486	HOOK3	hook microtubule tethering protein 3 [Source:HGNC Symbol;Acc:HGNC:23576]
ENSSSCG00000034896	HPRT1	hypoxanthine phosphoribosyltransferase 1 [Source:HGNC Symbol;Acc:HGNC:5157]
ENSSSCG00000037358	HPS5	HPS5 biogenesis of lysosomal organelles complex 2 subunit 2 [Source:NCBI gene;Acc:100049701]
ENSSSCG00000000849	HSP90B1	heat shock protein 90 beta family member 1 [Source:HGNC Symbol;Acc:HGNC:12028]
ENSSSCG00000010703	HTRA1	HtrA serine peptidase 1 [Source:HGNC Symbol;Acc:HGNC:9476]
ENSSSCG00000024363	HYAL3	hyaluronidase 3 [Source:HGNC Symbol;Acc:HGNC:5322]
ENSSSCG00000023264	IDH1	isocitrate dehydrogenase (NADP(+)) 1, cytosolic [Source:HGNC Symbol;Acc:HGNC:5382]
ENSSSCG00000029066	IDI1	isopentenyl-diphosphate delta isomerase 1 [Source:HGNC Symbol;Acc:HGNC:5387]
ENSSSCG00000005768	IER3IP1	immediate early response 3 interacting protein 1 [Source:HGNC Symbol;Acc:HGNC:18550]
ENSSSCG00000023796	IL18BP	interleukin 18 binding protein [Source:HGNC Symbol;Acc:HGNC:5987]
ENSSSCG00000036229	INSIG2	insulin induced gene 2 [Source:HGNC Symbol;Acc:HGNC:20452]
ENSSSCG00000014258	ISOC1	isochorismatase domain containing 1 [Source:HGNC Symbol;Acc:HGNC:24254]
ENSSSCG00000002743	IST1	IST1 factor associated with ESCRT-III [Source:HGNC Symbol;Acc:HGNC:28977]
ENSSSCG00000017213	JPT1	Jupiter microtubule associated homolog 1 [Source:HGNC Symbol;Acc:HGNC:14569]
ENSSSCG00000009934	KCTD10	potassium channel tetramerization domain containing 10 [Source:HGNC Symbol;Acc:HGNC:23236]
ENSSSCG00000008058	KCTD5	potassium channel tetramerization domain containing 5 [Source:HGNC Symbol;Acc:HGNC:21423]
ENSSSCG00000014060	KIAA1191	KIAA1191 [Source:HGNC Symbol;Acc:HGNC:29209]
ENSSSCG00000004969	KIF23	kinesin family member 23 [Source:HGNC Symbol;Acc:HGNC:6392]
ENSSSCG00000005437	KLF4	Kruppel like factor 4 [Source:HGNC Symbol;Acc:HGNC:6348]
ENSSSCG00000015931	KLHL41	kelch like family member 41 [Source:HGNC Symbol;Acc:HGNC:16905]
ENSSSCG00000038469	KLHL7	kelch like family member 7 [Source:HGNC Symbol;Acc:HGNC:15646]
ENSSSCG00000002895	KMT2B	lysine methyltransferase 2B [Source:HGNC Symbol;Acc:HGNC:15840]
ENSSSCG00000025203	KNOP1	lysine rich nucleolar protein 1 [Source:HGNC Symbol;Acc:HGNC:34404]
ENSSSCG00000034284	LAIR1	leukocyte associated immunoglobulin like receptor 1 [Source:HGNC Symbol;Acc:HGNC:6477]
ENSSSCG00000034280	LARP1B	La ribonucleoprotein domain family member 1B [Source:HGNC Symbol;Acc:HGNC:24704]
ENSSSCG00000013366	LDHA	lactate dehydrogenase A [Source:HGNC Symbol;Acc:HGNC:6535]
ENSSSCG00000002898	LIN37	lin-37 DREAM MuvB core complex component [Source:HGNC Symbol;Acc:HGNC:33234]
ENSSSCG00000031580	LLPH	LLP homolog, long-term synaptic facilitation factor [Source:HGNC Symbol;Acc:HGNC:28229]
ENSSSCG00000005457	LPAR1	lysophosphatidic acid receptor 1 [Source:HGNC Symbol;Acc:HGNC:3166]
ENSSSCG00000008452	LRPPRC	leucine rich pentatricopeptide repeat containing [Source:HGNC Symbol;Acc:HGNC:15714]
ENSSSCG00000016330	LRRFIP1	LRR binding FLII interacting protein 1 [Source:HGNC Symbol;Acc:HGNC:6702]
ENSSSCG00000034314	LSM4	LSM4 homolog, U6 small nuclear RNA and mRNA degradation associated [Source:HGNC Symbol;Acc:HGNC:17259]
ENSSSCG00000012985	LTBP3	latent transforming growth factor beta binding protein 3 [Source:HGNC Symbol;Acc:HGNC:6716]
ENSSSCG00000017555	LUC7L3	LUC7 like 3 pre-mRNA splicing factor [Source:HGNC Symbol;Acc:HGNC:24309]
ENSSSCG00000006260	LYPLA1	lysophospholipase 1 [Source:HGNC Symbol;Acc:HGNC:6737]
ENSSSCG00000003849	MAGOH	mago homolog, exon junction complex subunit [Source:HGNC Symbol;Acc:HGNC:6815]
ENSSSCG00000000635	MAGOHB	mago homolog B, exon junction complex subunit [Source:HGNC Symbol;Acc:HGNC:25504]
ENSSSCG00000010164	MAP3K21	mitogen-activated protein kinase kinase kinase 21 [Source:HGNC Symbol;Acc:HGNC:29798]
ENSSSCG00000007253	MAPRE1	microtubule associated protein RP/EB family member 1 [Source:HGNC Symbol;Acc:HGNC:6890]
ENSSSCG00000013435	MBD3	methyl-CpG binding domain protein 3 [Source:HGNC Symbol;Acc:HGNC:6918]
ENSSSCG00000015116	MCAM	melanoma cell adhesion molecule [Source:HGNC Symbol;Acc:HGNC:6934]
ENSSSCG00000013260	MDK	midkine [Source:HGNC Symbol;Acc:HGNC:6972]
ENSSSCG00000000483	MDM1	Mdm1 nuclear protein [Source:HGNC Symbol;Acc:HGNC:29917]
ENSSSCG00000028458	METTL5	methyltransferase like 5 [Source:HGNC Symbol;Acc:HGNC:25006]
ENSSSCG00000007089	MGME1	mitochondrial genome maintenance exonuclease 1 [Source:HGNC Symbol;Acc:HGNC:16205]
ENSSSCG00000011723	MME	membrane metalloendopeptidase [Source:HGNC Symbol;Acc:HGNC:7154]
ENSSSCG00000014861	MOGAT2	monoacylglycerol O-acyltransferase 2 [Source:HGNC Symbol;Acc:HGNC:23248]
ENSSSCG00000017300	MRC2	mannose receptor C type 2 [Source:HGNC Symbol;Acc:HGNC:16875]
ENSSSCG00000027746	MRFAP1	Morf4 family associated protein 1 [Source:HGNC Symbol;Acc:HGNC:24549]
ENSSSCG00000030578	MRPL15	mitochondrial ribosomal protein L15 [Source:HGNC Symbol;Acc:HGNC:14054]
ENSSSCG00000034129	MRPL33	mitochondrial ribosomal protein L33 [Source:HGNC Symbol;Acc:HGNC:14487]
ENSSSCG00000027974	MRPL50	mitochondrial ribosomal protein L50 [Source:HGNC Symbol;Acc:HGNC:16654]
ENSSSCG00000040782	MRPS21	mitochondrial ribosomal protein S21 [Source:HGNC Symbol;Acc:HGNC:14046]
ENSSSCG00000037987	MS4A10	membrane spanning 4-domains A10 [Source:HGNC Symbol;Acc:HGNC:13368]
ENSSSCG00000013102	MS4A7	membrane spanning 4-domains A7 [Source:HGNC Symbol;Acc:HGNC:13378]
ENSSSCG00000011077	MSRB2	methionine sulfoxide reductase B2 [Source:HGNC Symbol;Acc:HGNC:17061]
ENSSSCG00000005135	MTAP	methylthioadenosine phosphorylase [Source:HGNC Symbol;Acc:HGNC:7413]
ENSSSCG00000003253	MYADM	myeloid associated differentiation marker [Source:HGNC Symbol;Acc:HGNC:7544]
ENSSSCG00000007288	MYH7B	myosin heavy chain 7B [Source:HGNC Symbol;Acc:HGNC:15906]
ENSSSCG00000003691	MYL12A	myosin light chain 12A [Source:HGNC Symbol;Acc:HGNC:16701]
ENSSSCG00000001063	MYLIP	myosin regulatory light chain interacting protein [Source:HGNC Symbol;Acc:HGNC:21155]
ENSSSCG00000002841	N4BP1	NEDD4 binding protein 1 [Source:HGNC Symbol;Acc:HGNC:29850]
ENSSSCG00000040566	N4BP2L1	NEDD4 binding protein 2 like 1 [Source:HGNC Symbol;Acc:HGNC:25037]
ENSSSCG00000011917	NAA50	N(alpha)-acetyltransferase 50, NatE catalytic subunit [Source:HGNC Symbol;Acc:HGNC:29533]
ENSSSCG00000014893	NARS2	asparaginyl-tRNA synthetase 2, mitochondrial [Source:HGNC Symbol;Acc:HGNC:26274]
ENSSSCG00000014371	NDUFA2	NADH:ubiquinone oxidoreductase subunit A2 [Source:HGNC Symbol;Acc:HGNC:7685]
ENSSSCG00000037869	NDUFA5	NADH:ubiquinone oxidoreductase subunit A5 [Source:HGNC Symbol;Acc:HGNC:7688]
ENSSSCG00000010795	NDUFAB1	NADH:ubiquinone oxidoreductase subunit AB1 [Source:HGNC Symbol;Acc:HGNC:7694]
ENSSSCG00000016100	NDUFB3	NADH:ubiquinone oxidoreductase subunit B3 [Source:HGNC Symbol;Acc:HGNC:7698]
ENSSSCG00000011764	NDUFB5	NADH:ubiquinone oxidoreductase subunit B5 [Source:HGNC Symbol;Acc:HGNC:7700]
ENSSSCG00000017766	NEK8	NIMA related kinase 8 [Source:HGNC Symbol;Acc:HGNC:13387]
ENSSSCG00000016053	NEMP2	nuclear envelope integral membrane protein 2 [Source:HGNC Symbol;Acc:HGNC:33700]
ENSSSCG00000025007	NFU1	NFU1 iron-sulfur cluster scaffold [Source:HGNC Symbol;Acc:HGNC:16287]
ENSSSCG00000036659	NIPSNAP2	nipsnap homolog 2 [Source:HGNC Symbol;Acc:HGNC:4179]
ENSSSCG00000031142	NMNAT3	nicotinamide nucleotide adenylyltransferase 3 [Source:HGNC Symbol;Acc:HGNC:20989]
ENSSSCG00000017144	NPTX1	neuronal pentraxin 1 [Source:HGNC Symbol;Acc:HGNC:7952]
ENSSSCG00000003211	NR1H2	nuclear receptor subfamily 1 group H member 2 [Source:HGNC Symbol;Acc:HGNC:7965]
ENSSSCG00000014075	NSA2	NSA2 ribosome biogenesis factor [Source:HGNC Symbol;Acc:HGNC:30728]
ENSSSCG00000017316	NSF	N-ethylmaleimide sensitive factor, vesicle fusing ATPase [Source:HGNC Symbol;Acc:HGNC:8016]
ENSSSCG00000022912	NT5C3A	5'-nucleotidase, cytosolic IIIA [Source:HGNC Symbol;Acc:HGNC:17820]
ENSSSCG00000002697	NUDT7	nudix hydrolase 7 [Source:HGNC Symbol;Acc:HGNC:8054]
ENSSSCG00000009673	NUGGC	nuclear GTPase, germinal center associated [Source:HGNC Symbol;Acc:HGNC:33550]
ENSSSCG00000022178	NUMB	NUMB endocytic adaptor protein [Source:HGNC Symbol;Acc:HGNC:8060]
ENSSSCG00000030295	NUTF2	nuclear transport factor 2 [Source:HGNC Symbol;Acc:HGNC:13722]
ENSSSCG00000013874	OCEL1	occludin/ELL domain containing 1 [Source:HGNC Symbol;Acc:HGNC:26221]
ENSSSCG00000012403	OGT	O-linked N-acetylglucosamine (GlcNAc) transferase [Source:HGNC Symbol;Acc:HGNC:8127]
ENSSSCG00000016044	ORMDL1	ORMDL sphingolipid biosynthesis regulator 1 [Source:HGNC Symbol;Acc:HGNC:16036]
ENSSSCG00000000365	ORMDL2	ORMDL sphingolipid biosynthesis regulator 2 [Source:HGNC Symbol;Acc:HGNC:16037]
ENSSSCG00000017518	OSBPL7	oxysterol binding protein like 7 [Source:HGNC Symbol;Acc:HGNC:16387]
ENSSSCG00000009145	OSTC	oligosaccharyltransferase complex non-catalytic subunit [Source:HGNC Symbol;Acc:HGNC:24448]
ENSSSCG00000000377	PA2G4	proliferation-associated 2G4 [Source:HGNC Symbol;Acc:HGNC:8550]
ENSSSCG00000007947	PAM16	presequence translocase associated motor 16 [Source:HGNC Symbol;Acc:HGNC:29679]
ENSSSCG00000002505	PAPOLA	poly(A) polymerase alpha [Source:HGNC Symbol;Acc:HGNC:14981]
ENSSSCG00000036083	PCGF5	polycomb group ring finger 5 [Source:HGNC Symbol;Acc:HGNC:28264]
ENSSSCG00000036491	PCNP	PEST proteolytic signal containing nuclear protein [Source:HGNC Symbol;Acc:HGNC:30023]
ENSSSCG00000011465	PDE12	phosphodiesterase 12 [Source:HGNC Symbol;Acc:HGNC:25386]
ENSSSCG00000023643	PDHA1	pyruvate dehydrogenase E1 alpha 1 subunit [Source:HGNC Symbol;Acc:HGNC:8806]
ENSSSCG00000010669	PDZD8	PDZ domain containing 8 [Source:HGNC Symbol;Acc:HGNC:26974]
ENSSSCG00000003326	PEG3	paternally expressed 3 [Source:HGNC Symbol;Acc:HGNC:8826]
ENSSSCG00000017983	PER1	period circadian regulator 1 [Source:HGNC Symbol;Acc:HGNC:8845]
ENSSSCG00000001505	PFDN6	prefoldin subunit 6 [Source:HGNC Symbol;Acc:HGNC:4926]
ENSSSCG00000010517	PGAM1	phosphoglycerate mutase 1 [Source:HGNC Symbol;Acc:HGNC:8888]
ENSSSCG00000013878	PGLS	6-phosphogluconolactonase [Source:HGNC Symbol;Acc:HGNC:8903]
ENSSSCG00000002844	PHKB	phosphorylase kinase regulatory subunit beta [Source:HGNC Symbol;Acc:HGNC:8927]
ENSSSCG00000008440	PIGF	phosphatidylinositol glycan anchor biosynthesis class F [Source:HGNC Symbol;Acc:HGNC:8962]
ENSSSCG00000009692	PINX1	PIN2 (TERF1) interacting telomerase inhibitor 1 [Source:HGNC Symbol;Acc:HGNC:30046]
ENSSSCG00000009967	PITPNB	phosphatidylinositol transfer protein beta [Source:HGNC Symbol;Acc:HGNC:9002]
ENSSSCG00000036741	PITX1	paired like homeodomain 1 [Source:HGNC Symbol;Acc:HGNC:9004]
ENSSSCG00000002688	PLCG2	phospholipase C gamma 2 [Source:HGNC Symbol;Acc:HGNC:9066]
ENSSSCG00000015826	PLPBP	pyridoxal phosphate binding protein [Source:HGNC Symbol;Acc:HGNC:9457]
ENSSSCG00000014004	PLPP2	phospholipid phosphatase 2 [Source:HGNC Symbol;Acc:HGNC:9230]
ENSSSCG00000007435	PLTP	phospholipid transfer protein [Source:HGNC Symbol;Acc:HGNC:9093]
ENSSSCG00000008352	PNO1	partner of NOB1 homolog [Source:HGNC Symbol;Acc:HGNC:32790]
ENSSSCG00000007031	POLB	DNA polymerase beta [Source:HGNC Symbol;Acc:HGNC:9174]
ENSSSCG00000016597	POT1	protection of telomeres 1 [Source:HGNC Symbol;Acc:HGNC:17284]
ENSSSCG00000004760	PPP1R14D	protein phosphatase 1 regulatory inhibitor subunit 14D [Source:HGNC Symbol;Acc:HGNC:14953]
ENSSSCG00000010301	PPP3CB	protein phosphatase 3 catalytic subunit beta [Source:HGNC Symbol;Acc:HGNC:9315]
ENSSSCG00000001433	PPT2	palmitoyl-protein thioesterase 2 [Source:HGNC Symbol;Acc:HGNC:9326]
ENSSSCG00000037307	PRC1	protein regulator of cytokinesis 1 [Source:HGNC Symbol;Acc:HGNC:9341]
ENSSSCG00000020710	PRDM2	PR/SET domain 2 [Source:HGNC Symbol;Acc:HGNC:9347]
ENSSSCG00000003914	PRDX1	peroxiredoxin 1 [Source:HGNC Symbol;Acc:HGNC:9352]
ENSSSCG00000000185	PRKAG1	protein kinase AMP-activated non-catalytic subunit gamma 1 [Source:HGNC Symbol;Acc:HGNC:9385]
ENSSSCG00000000273	PRR13	proline rich 13 [Source:HGNC Symbol;Acc:HGNC:24528]
ENSSSCG00000013391	PSMA1	proteasome subunit alpha 1 [Source:HGNC Symbol;Acc:HGNC:9530]
ENSSSCG00000006830	PSMA5	proteasome subunit alpha 5 [Source:HGNC Symbol;Acc:HGNC:9534]
ENSSSCG00000001950	PSMA6	protein only RNase P catalytic subunit [Source:NCBI gene;Acc:100519610]
ENSSSCG00000006628	PSMD4	proteasome 26S subunit, non-ATPase 4 [Source:HGNC Symbol;Acc:HGNC:9561]
ENSSSCG00000036658	PSMD8	proteasome 26S subunit, non-ATPase 8 [Source:HGNC Symbol;Acc:HGNC:9566]
ENSSSCG00000002004	PSME2	proteasome activator subunit 2 [Source:HGNC Symbol;Acc:HGNC:9569]
ENSSSCG00000036988	PSMG4	proteasome assembly chaperone 4 [Source:HGNC Symbol;Acc:HGNC:21108]
ENSSSCG00000021738	PTPN2	protein tyrosine phosphatase non-receptor type 2 [Source:HGNC Symbol;Acc:HGNC:9650]
ENSSSCG00000002425	PTPN21	protein tyrosine phosphatase non-receptor type 21 [Source:HGNC Symbol;Acc:HGNC:9651]
ENSSSCG00000024567	PTPRH	protein tyrosine phosphatase receptor type H [Source:HGNC Symbol;Acc:HGNC:9672]
ENSSSCG00000015040	PTS	6-pyruvoyltetrahydropterin synthase [Source:HGNC Symbol;Acc:HGNC:9689]
ENSSSCG00000017038	PWWP2A	PWWP domain containing 2A [Source:HGNC Symbol;Acc:HGNC:29406]
ENSSSCG00000033792	RAB40C	RAB40C, member RAS oncogene family [Source:HGNC Symbol;Acc:HGNC:18285]
ENSSSCG00000015499	RABGAP1L	RAB GTPase activating protein 1 like [Source:HGNC Symbol;Acc:HGNC:24663]
ENSSSCG00000005436	RAD23B	RAD23 homolog B, nucleotide excision repair protein [Source:HGNC Symbol;Acc:HGNC:9813]
ENSSSCG00000025672	RAVER2	ribonucleoprotein, PTB binding 2 [Source:HGNC Symbol;Acc:HGNC:25577]
ENSSSCG00000024419	RBBP8	RB binding protein 8, endonuclease [Source:HGNC Symbol;Acc:HGNC:9891]
ENSSSCG00000038581	RBIS	ribosomal biogenesis factor [Source:HGNC Symbol;Acc:HGNC:32235]
ENSSSCG00000028663	RBM25	RNA binding motif protein 25 [Source:HGNC Symbol;Acc:HGNC:23244]
ENSSSCG00000034614	RFT1	RFT1 homolog [Source:HGNC Symbol;Acc:HGNC:30220]
ENSSSCG00000005480	RGS3	regulator of G protein signaling 3 [Source:HGNC Symbol;Acc:HGNC:9999]
ENSSSCG00000031172	RNF11	ring finger protein 11 [Source:HGNC Symbol;Acc:HGNC:10056]
ENSSSCG00000039551	RNF126	ring finger protein 126 [Source:HGNC Symbol;Acc:HGNC:21151]
ENSSSCG00000037341	RNF220	ring finger protein 220 [Source:HGNC Symbol;Acc:HGNC:25552]
ENSSSCG00000017671	RNFT1	ring finger protein, transmembrane 1 [Source:HGNC Symbol;Acc:HGNC:30206]
ENSSSCG00000024974	RPL13	ribosomal protein L13 [Source:HGNC Symbol;Acc:HGNC:10303]
ENSSSCG00000037030	RPL15	ribosomal protein L15 [Source:HGNC Symbol;Acc:HGNC:10306]
ENSSSCG00000025928	RPL18	ribosomal protein L18 [Source:HGNC Symbol;Acc:HGNC:10310]
ENSSSCG00000017509	RPL19	ribosomal protein L19 [Source:HGNC Symbol;Acc:HGNC:10312]
ENSSSCG00000009303	RPL21	ribosomal protein L21 [Source:HGNC Symbol;Acc:HGNC:10313]
ENSSSCG00000035080	RPL23A	ribosomal protein L23a [Source:HGNC Symbol;Acc:HGNC:10317]
ENSSSCG00000011952	RPL24	ribosomal protein L24 [Source:HGNC Symbol;Acc:HGNC:10325]
ENSSSCG00000039460	RPL28	ribosomal protein L28 [Source:HGNC Symbol;Acc:HGNC:10330]
ENSSSCG00000027573	RPL29	ribosomal protein L29 [Source:HGNC Symbol;Acc:HGNC:10331]
ENSSSCG00000008170	RPL31	ribosomal protein L31 [Source:HGNC Symbol;Acc:HGNC:10334]
ENSSSCG00000039046	RPL36A-HNRNPH2	RPL36A-HNRNPH2 readthrough [Source:HGNC Symbol;Acc:HGNC:48349]
ENSSSCG00000017239	RPL38	ribosomal protein L38 [Source:HGNC Symbol;Acc:HGNC:10349]
ENSSSCG00000004945	RPL4	ribosomal protein L4 [Source:HGNC Symbol;Acc:HGNC:10353]
ENSSSCG00000035768	RPS15A	ribosomal protein S15a [Source:HGNC Symbol;Acc:HGNC:10389]
ENSSSCG00000033697	RPS2	ribosomal protein S2 [Source:HGNC Symbol;Acc:HGNC:10404]
ENSSSCG00000036296	RPS25	ribosomal protein S25 [Source:HGNC Symbol;Acc:HGNC:10413]
ENSSSCG00000023158	RPS27L	ribosomal protein S27 like [Source:HGNC Symbol;Acc:HGNC:18476]
ENSSSCG00000013597	RPS28	ribosomal protein S28 [Source:HGNC Symbol;Acc:HGNC:10418]
ENSSSCG00000014855	RPS3	ribosomal protein S3 [Source:HGNC Symbol;Acc:HGNC:10420]
ENSSSCG00000017670	RPS6KB1	ribosomal protein S6 kinase B1 [Source:HGNC Symbol;Acc:HGNC:10436]
ENSSSCG00000003930	RPS8	ribosomal protein S8 [Source:HGNC Symbol;Acc:HGNC:10441]
ENSSSCG00000027556	RSRC1	arginine and serine rich coiled-coil 1 [Source:HGNC Symbol;Acc:HGNC:24152]
ENSSSCG00000004446	RWDD1	RWD domain containing 1 [Source:HGNC Symbol;Acc:HGNC:20993]
ENSSSCG00000010706	SAMD4B	sterile alpha motif domain containing 4B [Source:HGNC Symbol;Acc:HGNC:25492]
ENSSSCG00000008836	SCFD2	sec1 family domain containing 2 [Source:HGNC Symbol;Acc:HGNC:30676]
ENSSSCG00000038550	SCOC	short coiled-coil protein [Source:HGNC Symbol;Acc:HGNC:20335]
ENSSSCG00000012984	SCYL1	SCY1 like pseudokinase 1 [Source:HGNC Symbol;Acc:HGNC:14372]
ENSSSCG00000008974	SDAD1	SDA1 domain containing 1 [Source:HGNC Symbol;Acc:HGNC:25537]
ENSSSCG00000036865	SDS	serine dehydratase [Source:HGNC Symbol;Acc:HGNC:10691]
ENSSSCG00000001934	SEC23A	Sec23 homolog A, coat complex II component [Source:HGNC Symbol;Acc:HGNC:10701]
ENSSSCG00000010306	SEC24C	SEC24 homolog C, COPII coat complex component [Source:HGNC Symbol;Acc:HGNC:10705]
ENSSSCG00000003554	SELENON	selenoprotein N [Source:HGNC Symbol;Acc:HGNC:15999]
ENSSSCG00000031659	SEPHS1	selenophosphate synthetase 1 [Source:HGNC Symbol;Acc:HGNC:19685]
ENSSSCG00000024263	SERF2	small EDRK-rich factor 2 [Source:NCBI gene;Acc:100154963]
ENSSSCG00000006665	SF3B4	splicing factor 3b subunit 4 [Source:HGNC Symbol;Acc:HGNC:10771]
ENSSSCG00000008722	SH3TC1	SH3 domain and tetratricopeptide repeats 1 [Source:HGNC Symbol;Acc:HGNC:26009]
ENSSSCG00000004518	SKA1	spindle and kinetochore associated complex subunit 1 [Source:HGNC Symbol;Acc:HGNC:28109]
ENSSSCG00000006382	SLAMF6	SLAM family member 6 [Source:HGNC Symbol;Acc:HGNC:21392]
ENSSSCG00000033037	SLC25A37	solute carrier family 25 member 37 [Source:HGNC Symbol;Acc:HGNC:29786]
ENSSSCG00000025316	SLC33A1	solute carrier family 33 member 1 [Source:HGNC Symbol;Acc:HGNC:95]
ENSSSCG00000003353	SLC35E2B	solute carrier family 35 member E2B [Source:HGNC Symbol;Acc:HGNC:33941]
ENSSSCG00000005092	SLC38A6	solute carrier family 38 member 6 [Source:HGNC Symbol;Acc:HGNC:19863]
ENSSSCG00000006490	SMG5	SMG5 nonsense mediated mRNA decay factor [Source:HGNC Symbol;Acc:HGNC:24644]
ENSSSCG00000033814	SMIM15	small integral membrane protein 15 [Source:HGNC Symbol;Acc:HGNC:33861]
ENSSSCG00000012166	SMS	spermine synthase [Source:HGNC Symbol;Acc:HGNC:11123]
ENSSSCG00000005184	SNAPC3	small nuclear RNA activating complex polypeptide 3 [Source:HGNC Symbol;Acc:HGNC:11136]
ENSSSCG00000023792	SNRNP70	small nuclear ribonucleoprotein U1 subunit 70 [Source:HGNC Symbol;Acc:HGNC:11150]
ENSSSCG00000040857	SNRPB	small nuclear ribonucleoprotein polypeptides B and B1 [Source:HGNC Symbol;Acc:HGNC:11153]
ENSSSCG00000033500	SNRPD2	small nuclear ribonucleoprotein D2 polypeptide [Source:HGNC Symbol;Acc:HGNC:11159]
ENSSSCG00000024776	SNRPG	small nuclear ribonucleoprotein polypeptide G [Source:HGNC Symbol;Acc:HGNC:11163]
ENSSSCG00000036956	SOCS3	suppressor of cytokine signaling 3 [Source:HGNC Symbol;Acc:HGNC:19391]
ENSSSCG00000032214	SOCS6	suppressor of cytokine signaling 6 [Source:HGNC Symbol;Acc:HGNC:16833]
ENSSSCG00000000199	SPATS2	spermatogenesis associated serine rich 2 [Source:HGNC Symbol;Acc:HGNC:18650]
ENSSSCG00000014850	SPCS2	signal peptidase complex subunit 2 [Source:HGNC Symbol;Acc:HGNC:28962]
ENSSSCG00000039769	SPIRE1	spire type actin nucleation factor 1 [Source:HGNC Symbol;Acc:HGNC:30622]
ENSSSCG00000017879	SPNS2	sphingolipid transporter 2 [Source:HGNC Symbol;Acc:HGNC:26992]
ENSSSCG00000008309	SPR	sepiapterin reductase [Source:HGNC Symbol;Acc:HGNC:11257]
ENSSSCG00000027689	SRM	spermidine synthase [Source:HGNC Symbol;Acc:HGNC:11296]
ENSSSCG00000031664	SRP9	signal recognition particle 9 [Source:HGNC Symbol;Acc:HGNC:11304]
ENSSSCG00000003348	SSU72	SSU72 homolog, RNA polymerase II CTD phosphatase [Source:HGNC Symbol;Acc:HGNC:25016]
ENSSSCG00000000071	ST13	ST13 Hsp70 interacting protein [Source:HGNC Symbol;Acc:HGNC:11343]
ENSSSCG00000006179	STAU2	staufen double-stranded RNA binding protein 2 [Source:HGNC Symbol;Acc:HGNC:11371]
ENSSSCG00000016758	STK17A	serine/threonine kinase 17a [Source:HGNC Symbol;Acc:HGNC:11395]
ENSSSCG00000008433	STPG4	sperm-tail PG-rich repeat containing 4 [Source:HGNC Symbol;Acc:HGNC:26850]
ENSSSCG00000036970	SUGP1	SURP and G-patch domain containing 1 [Source:HGNC Symbol;Acc:HGNC:18643]
ENSSSCG00000035795	SUMO3	small ubiquitin like modifier 3 [Source:HGNC Symbol;Acc:HGNC:11124]
ENSSSCG00000026389	SYNJ2BP	synaptojanin 2 binding protein [Source:HGNC Symbol;Acc:HGNC:18955]
ENSSSCG00000015434	SYPL1	synaptophysin like 1 [Source:HGNC Symbol;Acc:HGNC:11507]
ENSSSCG00000014909	SYTL2	synaptotagmin like 2 [Source:HGNC Symbol;Acc:HGNC:15585]
ENSSSCG00000031083	SZRD1	SUZ RNA binding domain containing 1 [Source:HGNC Symbol;Acc:HGNC:30232]
ENSSSCG00000029630	TAF10	TATA-box binding protein associated factor 10 [Source:HGNC Symbol;Acc:HGNC:11543]
ENSSSCG00000023126	TARDBP	TAR DNA binding protein [Source:HGNC Symbol;Acc:HGNC:11571]
ENSSSCG00000012523	TCEAL8	transcription elongation factor A like 8 [Source:HGNC Symbol;Acc:HGNC:28683]
ENSSSCG00000009926	TCHP	trichoplein keratin filament binding [Source:HGNC Symbol;Acc:HGNC:28135]
ENSSSCG00000025106	THNSL2	threonine synthase like 2 [Source:HGNC Symbol;Acc:HGNC:25602]
ENSSSCG00000010685	TIAL1	TIA1 cytotoxic granule associated RNA binding protein like 1 [Source:HGNC Symbol;Acc:HGNC:11804]
ENSSSCG00000037431	TIMM17A	translocase of inner mitochondrial membrane 17A [Source:HGNC Symbol;Acc:HGNC:17315]
ENSSSCG00000001994	TINF2	TERF1 interacting nuclear factor 2 [Source:HGNC Symbol;Acc:HGNC:11824]
ENSSSCG00000000906	TMCC3	transmembrane and coiled-coil domain family 3 [Source:HGNC Symbol;Acc:HGNC:29199]
ENSSSCG00000028397	TMEM106C	transmembrane protein 106C [Source:HGNC Symbol;Acc:HGNC:28775]
ENSSSCG00000015473	TMEM183A	transmembrane protein 183A [Source:HGNC Symbol;Acc:HGNC:20173]
ENSSSCG00000002790	TMEM208	transmembrane protein 208 [Source:HGNC Symbol;Acc:HGNC:25015]
ENSSSCG00000038711	TMEM223	transmembrane protein 223 [Source:HGNC Symbol;Acc:HGNC:28464]
ENSSSCG00000025921	TMEM41A	transmembrane protein 41A [Source:HGNC Symbol;Acc:HGNC:30544]
ENSSSCG00000012119	TMSB4X	thymosin beta 4 X-linked [Source:HGNC Symbol;Acc:HGNC:11881]
ENSSSCG00000013176	TMX2	thioredoxin related transmembrane protein 2 [Source:HGNC Symbol;Acc:HGNC:30739]
ENSSSCG00000010158	TOMM20	translocase of outer mitochondrial membrane 20 [Source:HGNC Symbol;Acc:HGNC:20947]
ENSSSCG00000007355	TOP1	DNA topoisomerase I [Source:HGNC Symbol;Acc:HGNC:11986]
ENSSSCG00000026953	TPGS2	tubulin polyglutamylase complex subunit 2 [Source:HGNC Symbol;Acc:HGNC:24561]
ENSSSCG00000016949	TRAPPC13	trafficking protein particle complex 13 [Source:HGNC Symbol;Acc:HGNC:25828]
ENSSSCG00000017199	TRIM47	tripartite motif containing 47 [Source:HGNC Symbol;Acc:HGNC:19020]
ENSSSCG00000020777	TRIOBP	TRIO and F-actin binding protein [Source:HGNC Symbol;Acc:HGNC:17009]
ENSSSCG00000003667	TRIT1	tRNA isopentenyltransferase 1 [Source:HGNC Symbol;Acc:HGNC:20286]
ENSSSCG00000031121	TSEN15	tRNA splicing endonuclease subunit 15 [Source:HGNC Symbol;Acc:HGNC:16791]
ENSSSCG00000040528	TTC1	tetratricopeptide repeat domain 1 [Source:HGNC Symbol;Acc:HGNC:12391]
ENSSSCG00000014165	TTC37	tetratricopeptide repeat domain 37 [Source:HGNC Symbol;Acc:HGNC:23639]
ENSSSCG00000011506	UBA3	ubiquitin like modifier activating enzyme 3 [Source:HGNC Symbol;Acc:HGNC:12470]
ENSSSCG00000023603	UBALD1	UBA like domain containing 1 [Source:HGNC Symbol;Acc:HGNC:29576]
ENSSSCG00000033987	UBE2E3	ubiquitin conjugating enzyme E2 E3 [Source:HGNC Symbol;Acc:HGNC:12479]
ENSSSCG00000023331	UBL5	ubiquitin like 5 [Source:HGNC Symbol;Acc:HGNC:13736]
ENSSSCG00000006363	UFC1	ubiquitin-fold modifier conjugating enzyme 1 [Source:HGNC Symbol;Acc:HGNC:26941]
ENSSSCG00000005201	UHRF2	ubiquitin like with PHD and ring finger domains 2 [Source:HGNC Symbol;Acc:HGNC:12557]
ENSSSCG00000011117	UPF2	UPF2 regulator of nonsense mediated mRNA decay [Source:HGNC Symbol;Acc:HGNC:17854]
ENSSSCG00000027085	UQCRFS1	ubiquinol-cytochrome c reductase, Rieske iron-sulfur polypeptide 1 [Source:HGNC Symbol;Acc:HGNC:12587]
ENSSSCG00000040220	USP33	ubiquitin specific peptidase 33 [Source:HGNC Symbol;Acc:HGNC:20059]
ENSSSCG00000023187	VAV3	vav guanine nucleotide exchange factor 3 [Source:HGNC Symbol;Acc:HGNC:12659]
ENSSSCG00000012811	VBP1	VHL binding protein 1 [Source:HGNC Symbol;Acc:HGNC:12662]
ENSSSCG00000014296	VDAC1	voltage dependent anion channel 1 [Source:HGNC Symbol;Acc:HGNC:12669]
ENSSSCG00000010320	VDAC2	voltage dependent anion channel 2 [Source:HGNC Symbol;Acc:HGNC:12672]
ENSSSCG00000035364	VKORC1	vitamin K epoxide reductase complex subunit 1 [Source:HGNC Symbol;Acc:HGNC:23663]
ENSSSCG00000005282	VPS13A	vacuolar protein sorting 13 homolog A [Source:HGNC Symbol;Acc:HGNC:1908]
ENSSSCG00000006984	VPS37A	VPS37A subunit of ESCRT-I [Source:HGNC Symbol;Acc:HGNC:24928]
ENSSSCG00000013721	WDR83OS	WD repeat domain 83 opposite strand [Source:HGNC Symbol;Acc:HGNC:30203]
ENSSSCG00000013411	WEE1	WEE1 G2 checkpoint kinase [Source:HGNC Symbol;Acc:HGNC:12761]
ENSSSCG00000016685	WIPF3	WAS/WASL interacting protein family member 3 [Source:HGNC Symbol;Acc:HGNC:22004]
ENSSSCG00000017949	WRAP53	WD repeat containing antisense to TP53 [Source:HGNC Symbol;Acc:HGNC:25522]
ENSSSCG00000001010	WRNIP1	WRN helicase interacting protein 1 [Source:HGNC Symbol;Acc:HGNC:20876]
ENSSSCG00000025028	XIAP	X-linked inhibitor of apoptosis [Source:HGNC Symbol;Acc:HGNC:592]
ENSSSCG00000011678	XRN1	5'-3' exoribonuclease 1 [Source:HGNC Symbol;Acc:HGNC:30654]
ENSSSCG00000027429	YARS2	tyrosyl-tRNA synthetase 2 [Source:HGNC Symbol;Acc:HGNC:24249]
ENSSSCG00000028485	YBX1	Y-box binding protein 1 [Source:HGNC Symbol;Acc:HGNC:8014]
ENSSSCG00000007692	YWHAG	tyrosine 3-monooxygenase/tryptophan 5-monooxygenase activation protein gamma [Source:HGNC Symbol;Acc:HGNC:12852]
ENSSSCG00000003110	ZC3H4	zinc finger CCCH-type containing 4 [Source:HGNC Symbol;Acc:HGNC:17808]
ENSSSCG00000009792	ZCCHC8	zinc finger CCHC-type containing 8 [Source:HGNC Symbol;Acc:HGNC:25265]
ENSSSCG00000010519	ZDHHC16	zinc finger DHHC-type containing 16 [Source:HGNC Symbol;Acc:HGNC:20714]
ENSSSCG00000001779	ZFAND6	zinc finger AN1-type containing 6 [Source:HGNC Symbol;Acc:HGNC:30164]
ENSSSCG00000007454	ZMYND8	zinc finger MYND-type containing 8 [Source:HGNC Symbol;Acc:HGNC:9397]
ENSSSCG00000031166	ZNF296	zinc finger protein 296 [Source:HGNC Symbol;Acc:HGNC:15981]

## Sheet: Supplementary table 4
Supplementary table 4: Comparison of redundancy analysis response scores (> 0.5) between the current study (Current study) and previous experiment (Choudhury et al., 2021). Pre- and post-weaning associated microbial groups are listed for both the studies. Common microbial groups are marked in red (post-weaning associated) and green (pre-weaning associated).
Post-weaning (Current study)			Pre-weaning (Current study)			Post-weaning (Choudhury et al., 2021)			Pre-weaning (Choudhury et al., 2021)
Microbial groups	Resp.1		Microbial groups	Resp.1		Microbial groups	Resp.1		Microbial groups	Resp.1
Dialister	0.9637		Intestinimonas	-0.8463		Oribacterium	-0.9872		Bacteroides	0.977
Agathobacter	0.9469		Escherichia-Shigella	-0.836		Roseburia	-0.9837		Escherichia-Shigella	0.9339
Oribacterium	0.9444		Parabacteroides	-0.8253		Faecalibacterium	-0.9795		Cloacibacillus	0.8971
Syntrophococcus	0.9323		Actinomyces	-0.8207		Ruminococcaceae UCG-014	-0.9748		Methanobrevibacter	0.8703
Lachnospira	0.9318		Bilophila	-0.8046		Dialister	-0.9743		Fusobacterium	0.8539
Megasphaera	0.9258		Desulfovibrio	-0.8034		Lachnospiraceae UCG-001	-0.9711		Lachnoclostridium	0.8456
Ruminococcaceae UCG-008	0.9251		Butyricimonas	-0.8032		Lachnospiraceae ND3007 group	-0.9685		Romboutsia	0.8047
[Eubacterium] eligens group	0.9191		Christensenellaceae R-7 group	-0.7991		Lachnospiraceae NK3A20 group	-0.966		Peptostreptococcus	0.8035
Faecalibacterium	0.918		Bacteroides	-0.7923		Ruminococcaceae UCG-008	-0.9648		Corynebacterium 1	0.791
Ambiguous_taxa-28	0.9177		Alistipes	-0.791		Lachnospira	-0.9623		Eubacterium	0.7786
Libanicoccus	0.9176		Lachnoclostridium	-0.7888		Coprococcus 2	-0.9598		Butyricimonas	0.7754
Subdoligranulum	0.9075		Ambiguous_taxa-26	-0.7791		Ambiguous_taxa-13	-0.9587		Parabacteroides	0.7693
Roseburia	0.9062		Hydrogenoanaerobacterium	-0.7675		Lachnospiraceae UCG-008	-0.9547		Hungatella	0.7672
[Eubacterium] ruminantium group	0.9043		Rothia	-0.7664		Coprococcus 1	-0.9484		Actinomyces	0.762
uncultured bacterium-04	0.8991		Peptostreptococcus	-0.7615		Coprococcus 3	-0.9391		Enterococcus	0.7609
[Eubacterium] hallii group	0.8833		Faecalicoccus	-0.7542		[Eubacterium] ruminantium group	-0.9389		Faecalicoccus	0.7312
Lachnospiraceae NK3A20 group	0.8757		Cloacibacillus	-0.7517		Catenibacterium	-0.9334		Cellulosilyticum	0.7178
uncultured-30	0.8713		UBA1819	-0.7478		[Eubacterium] eligens group	-0.9294		Peptoniphilus	0.7115
{Unknown Genus} Eggerthellaceae	0.8613		Enterococcus	-0.7415		[Eubacterium] xylanophilum group	-0.9273		[Eubacterium] fissicatena group	0.7085
Coprococcus 2	0.852		Eubacterium	-0.7302		Ruminococcus 1	-0.9258		Bilophila	0.7066
Prevotella 9	0.8393		Sutterella	-0.7267		Prevotella 9	-0.9256		Actinobacillus	0.7051
Mitsuokella	0.8352		Fusobacterium	-0.7235		Anaerovibrio	-0.9241		UBA1819	0.6781
Lachnospiraceae UCG-008	0.8338		Methanobrevibacter	-0.7203		Blautia	-0.9226		Campylobacter	0.6732
Lachnospiraceae NK4B4 group	0.8254		[Eubacterium] fissicatena group	-0.7114		[Bacteroides] pectinophilus group	-0.9216		p-1088-a5 gut group	0.6702
Family XIII UCG-001	0.8206		Peptoniphilus	-0.7036		Subdoligranulum	-0.9176		Erysipelatoclostridium	0.6612
Erysipelotrichaceae UCG-006	0.82		Ruminococcaceae UCG-011	-0.6933		Shuttleworthia	-0.9172		Anaerococcus	0.6577
Solobacterium	0.8185		Hungatella	-0.6888		Methanosphaera	-0.9144		Bifidobacterium	0.6498
Coprococcus 1	0.8078		Eisenbergiella	-0.6826		Lachnospiraceae NC2004 group	-0.911		Streptococcus	0.6464
[Bacteroides] pectinophilus group	0.7957		Erysipelatoclostridium	-0.6779		Solobacterium	-0.9107		Alistipes	0.6421
Blautia	0.7891		Romboutsia	-0.6723		Prevotella 7	-0.9086		Intestinimonas	0.6377
Methanosphaera	0.7863		Ruminococcus 2	-0.6663		Lachnospiraceae NK4B4 group	-0.9012		Pasteurella	0.6278
Ruminococcus 1	0.7812		uncultured bacterium-17	-0.6411		Marvinbryantia	-0.8974		Sharpea	0.6092
Dorea	0.7769		uncultured-39	-0.6378		Family XIII UCG-001	-0.8972		DNF00809	0.6066
Fusicatenibacter	0.7666		CHKCI001	-0.6375		Anaerostipes	-0.8884		Eisenbergiella	0.592
Lachnospiraceae UCG-001	0.7562		DNF00809	-0.6306		Lachnospiraceae UCG-010	-0.8851		Finegoldia	0.591
Acidaminococcus	0.7485		Trueperella	-0.6264		Prevotella 1	-0.8771		Parvimonas	0.5739
Lachnospiraceae FCS020 group	0.7376		Dielma	-0.6203		Ruminiclostridium 9	-0.8718		Veillonella	0.5663
Catenibacterium	0.7321		Clostridium sensu stricto 1	-0.62		uncultured-03	-0.8653		Jeotgalicoccus	0.5651
Senegalimassilia	0.7231		Atopobium	-0.6195		Mitsuokella	-0.8649		Lachnospiraceae UCG-002	0.5475
Prevotella 7	0.7133		Howardella	-0.6135		Erysipelotrichaceae UCG-006	-0.8606		Facklamia	0.5433
Lactobacillus	0.7118		Epulopiscium	-0.5987		Enterorhabdus	-0.8537		Aerococcus	0.5417
[Eubacterium] ventriosum group	0.6957		[Clostridium] innocuum group	-0.5982		[Eubacterium] hallii group	-0.8505		N/A	0.5337
uncultured bacterium-19	0.6783		uncultured bacterium-32	-0.5949		Slackia	-0.8488		Howardella	0.5319
Thermovirga	0.6752		Ruminococcaceae NK4A214 group	-0.59		uncultured bacterium-03	-0.846		Acinetobacter	0.5312
Methanosaeta	0.665		Anaerococcus	-0.5893		Agathobacter	-0.8393		Synergistes	0.5252
[Eubacterium] xylanophilum group	0.6649		Incertae Sedis	-0.5888		Succinivibrionaceae UCG-001	-0.8259		Trueperella	0.5183
{Unknown Genus} Ruminococcaceae	0.6638		uncultured-19	-0.5872		Selenomonas 3	-0.8199		Jeotgalibaca	0.5126
[Ruminococcus] torques group	0.6628		Terrisporobacter	-0.5826		Catenisphaera	-0.816		Acetanaerobacterium	0.5103
Coprococcus 3	0.6603		Rikenellaceae RC9 gut group	-0.5784		Dorea	-0.8014
Pelotomaculum	0.6585		Odoribacter	-0.5694		Oscillospira	-0.7886
Anaerovibrio	0.6543		Actinobacillus	-0.5617		uncultured-21	-0.7869
Enterorhabdus	0.6497		[Ruminococcus] gnavus group	-0.5571		Kandleria	-0.7726
Selenomonas 3	0.6453		Helicobacter	-0.5529		Prevotellaceae UCG-003	-0.7589
Lachnospiraceae NC2004 group	0.6431		Arcanobacterium	-0.5504		Lachnospiraceae NK4A136 group	-0.7547
Sedimentibacter	0.6385		W5053	-0.5501		[Eubacterium] ventriosum group	-0.7544
Sarcina	0.6369		Clostridioides	-0.5499		Syntrophococcus	-0.7388
uncultured-05	0.6324		Clostridium sensu stricto 2	-0.5487		uncultured bacterium-15	-0.7353
Ruminiclostridium 5	0.6272		Ambiguous_taxa-29	-0.5477		Fibrobacter	-0.7349
Streptococcus	0.6258		Campylobacter	-0.5455		GCA-900066575	-0.7257
Proteiniphilum	0.6253		Phascolarctobacterium	-0.5407		Ruminiclostridium 5	-0.725
uncultured-09	0.6253		Pasteurella	-0.5402		uncultured-06	-0.7167
Ambiguous_taxa-07	0.6239		Catabacter	-0.5381		Lachnospiraceae FCS020 group	-0.7165
Lachnospiraceae ND3007 group	0.6215		Finegoldia	-0.5262		Moryella	-0.716
uncultured-28	0.6204		Bifidobacterium	-0.5262		Acidaminococcus	-0.7124
Anaerostipes	0.6192		Paraeggerthella	-0.5102		uncultured bacterium-12	-0.7057
Ambiguous_taxa-10	0.6164		Porphyromonas	-0.5095		Butyrivibrio	-0.7005
Proteiniclasticum	0.6153					Candidatus Saccharimonas	-0.6944
GCA-900066575	0.6153					Ruminococcaceae UCG-013	-0.6938
Carnobacterium	0.615					Intestinibacter	-0.6936
Lachnospiraceae NK4A136 group	0.6094					Fusicatenibacter	-0.6732
Erysipelotrichaceae UCG-009	0.6081					{Unknown Genus} Eggerthellaceae	-0.6722
uncultured-10	0.5984					Ruminiclostridium 6	-0.6659
uncultured bacterium-05	0.5919					Oscillibacter	-0.6636
Succinivibrio	0.5796					uncultured bacterium-29	-0.6625
Catenisphaera	0.5775					[Ruminococcus] torques group	-0.6433
Thioalkalispira	0.5773					Libanicoccus	-0.6412
uncultured-40	0.576					Tyzzerella 3	-0.6357
Blvii28 wastewater-sludge group	0.5741					Ruminococcaceae UCG-003	-0.6317
uncultured organism-05	0.5721					Lachnospiraceae UCG-003	-0.6294
uncultured Chloroflexi bacterium-03	0.5641					Ruminococcaceae UCG-009	-0.6264
Candidatus Caldatribacterium	0.5638					Megasphaera	-0.6233
uncultured Bacteroidetes bacterium	0.5629					Prevotellaceae NK3B31 group	-0.6197
Oceanotoga	0.5624					Ambiguous_taxa-03	-0.5973
uncultured-45	0.5609					uncultured organism-02	-0.5775
Alcaligenes	0.5585					Collinsella	-0.5764
LNR A2-18	0.5556					Alloprevotella	-0.576
Marinobacterium	0.5489					Ambiguous_taxa-14	-0.5712
Syntrophorhabdus	0.5471					Clostridium sensu stricto 6	-0.5708
Desulfonatronum	0.5462					Mailhella	-0.5644
Ruminococcaceae UCG-009	0.5432					[Ruminococcus] gauvreauii group	-0.5639
Ercella	0.543					Ruminococcaceae UCG-005	-0.5628
Caldicoprobacter	0.5414					Acetitomaculum	-0.5628
uncultured bacterium-34	0.5384					Lactobacillus	-0.5515
uncultured bacterium-38	0.5372					Prevotellaceae UCG-001	-0.5476
EBM-39	0.531					Lachnoclostridium 12	-0.5475
Petrimonas	0.5309					Holdemanella	-0.5424
Anaerovorax	0.5163					Ambiguous_taxa-05	-0.534
Dethiobacter	0.5144					Prevotella 2	-0.5202
Pseudoramibacter	0.5115					Allisonella	-0.5123
Intestinibacter	0.5044					[Eubacterium] oxidoreducens group	-0.5013
Ruminococcaceae UCG-003	0.5036

## Sheet: Supplementary table 5
Supplementary table 5: Comparison of redundancy analysis response scores (> 0.5) (a) Pre-weaning time-point day13 and post-weaning time-point day +19 (b) Day 29 EF and CON (c) Day +3 EF and CON. Common microbial groups are marked in red (day +19, EF day 29 and EF day +3) and green (day 13, CON day 29 and CON day +3).
(a) Post weaning day +19 (d13 vs d+19)			Pre weaning day 13 (d13 vs d+19)			(b) EF day 29 (EF vs CON)			CON day 29 (EF vs CON)			(c) EF day +3 (EF vs CON)			CON day +3 (EF vs CON)
Microbial groups	Resp.1		Microbial groups	Resp.1		Microbial groups	Resp.1		Microbial groups	Resp.1		Microbial groups	Resp.1		Microbial groups	Resp.1
Dialister	0.9637		Intestinimonas	-0.8463		Subdoligranulum	0.8817		RumEn M2	-0.8347		Tyzzerella 3	0.7847		Mitsuokella	-0.8462
Agathobacter	0.9469		Escherichia-Shigella	-0.836		Lachnospiraceae ND3007 group	0.8333		Ambiguous_taxa-23	-0.8188		Coprococcus 1	0.7504		Collinsella	-0.8099
Oribacterium	0.9444		Parabacteroides	-0.8253		Dorea	0.7505		Intestinimonas	-0.794		Alloprevotella	0.7346		Ambiguous_taxa-04	-0.6473
Syntrophococcus	0.9323		Actinomyces	-0.8207		Prevotella 1	0.7166		uncultured bacterium-11	-0.7883		uncultured bacterium-10	0.6972		Butyricicoccus	-0.5747
Lachnospira	0.9318		Bilophila	-0.8046		Actinomyces	0.7069		Aerosphaera	-0.7261		Lachnospiraceae bacterium 28-4	0.6865		Peptostreptococcus	-0.5414
Megasphaera	0.9258		Desulfovibrio	-0.8034		Catenisphaera	0.6974		Enterococcus	-0.6934		Candidatus Saccharimonas	0.6854		uncultured-39	-0.5206
Ruminococcaceae UCG-008	0.9251		Butyricimonas	-0.8032		Globicatella	0.693		Pyramidobacter	-0.6903		uncultured bacterium-14	0.666		Gemella	-0.5149
[Eubacterium] eligens group	0.9191		Christensenellaceae R-7 group	-0.7991		Fournierella	0.6903		Bilophila	-0.6735		Marvinbryantia	0.653
Faecalibacterium	0.918		Bacteroides	-0.7923		Holdemanella	0.6853		Methanobrevibacter	-0.6722		Selenomonas 3	0.6521
Ambiguous_taxa-28	0.9177		Alistipes	-0.791		Faecalibacterium	0.6803		Romboutsia	-0.6613		Prevotella 1	0.6421
Libanicoccus	0.9176		Lachnoclostridium	-0.7888		Enterorhabdus	0.6798		Cloacibacillus	-0.6564		Ruminococcaceae UCG-014	0.6376
Subdoligranulum	0.9075		Ambiguous_taxa-26	-0.7791		Lachnospiraceae NK3A20 group	0.6753		Mucispirillum	-0.6531		[Eubacterium] xylanophilum group	0.6188
Roseburia	0.9062		Hydrogenoanaerobacterium	-0.7675		Oribacterium	0.6713		CHKCI001	-0.6492		Parabacteroides	0.5986
[Eubacterium] ruminantium group	0.9043		Rothia	-0.7664		Agathobacter	0.6608		Cellulosilyticum	-0.6417		GCA-900066225	0.5968
uncultured bacterium-04	0.8991		Peptostreptococcus	-0.7615		Prevotella 7	0.6558		Gallicola	-0.6373		Ruminococcaceae UCG-013	0.5952
[Eubacterium] hallii group	0.8833		Faecalicoccus	-0.7542		Treponema 2	0.6478		uncultured bacterium-39	-0.6345		Prevotellaceae Ga6A1 group	0.5949
Lachnospiraceae NK3A20 group	0.8757		Cloacibacillus	-0.7517		Roseburia	0.6376		Parasutterella	-0.6294		Sphaerochaeta	0.5886
uncultured-30	0.8713		UBA1819	-0.7478		Ruminococcaceae UCG-008	0.6346		Sutterella	-0.6261		uncultured bacterium-27	0.5876
{Unknown Genus} Eggerthellaceae	0.8613		Enterococcus	-0.7415		Succinivibrio	0.6279		Christensenellaceae R-7 group	-0.6163		Lachnospiraceae AC2044 group	0.5837
Coprococcus 2	0.852		Eubacterium	-0.7302		Prevotella 9	0.6203		uncultured bacterium-27	-0.606		Lachnospiraceae UCG-004	0.5807
Prevotella 9	0.8393		Sutterella	-0.7267		Mitsuokella	0.6131		uncultured-39	-0.5956		uncultured organism-02	0.5725
Mitsuokella	0.8352		Fusobacterium	-0.7235		Lachnospiraceae FCS020 group	0.6106		uncultured bacterium-14	-0.5803		Methanobrevibacter	0.5688
Lachnospiraceae UCG-008	0.8338		Methanobrevibacter	-0.7203		Lactococcus	0.6093		Candidatus Methanoplasma	-0.5785		Oscillospira	0.566
Lachnospiraceae NK4B4 group	0.8254		[Eubacterium] fissicatena group	-0.7114		Curtobacterium	0.6		Anaerovorax	-0.5723		Catenisphaera	0.5537
Family XIII UCG-001	0.8206		Peptoniphilus	-0.7036		Acidaminococcus	0.5946		Sphaerochaeta	-0.571		Sarcina	0.5507
Erysipelotrichaceae UCG-006	0.82		Ruminococcaceae UCG-011	-0.6933		Blvii28 wastewater-sludge group	0.5881		Erysipelothrix	-0.5675		Agathobacter	0.5236
Solobacterium	0.8185		Hungatella	-0.6888		Ambiguous_taxa-04	0.586		Parabacteroides	-0.5622		Prevotellaceae UCG-003	0.5214
Coprococcus 1	0.8078		Eisenbergiella	-0.6826		Streptococcus	0.5828		uncultured bacterium-16	-0.5602		Lachnoanaerobaculum	0.5126
[Bacteroides] pectinophilus group	0.7957		Erysipelatoclostridium	-0.6779		Atopobium	0.5734		uncultured-07	-0.5552		Prevotellaceae NK3B31 group	0.5114
Blautia	0.7891		Romboutsia	-0.6723		Megasphaera	0.57		Oxalobacter	-0.5514		metagenome-03	0.5043
Methanosphaera	0.7863		Ruminococcus 2	-0.6663		Ruminiclostridium 5	0.5648		uncultured bacterium-58	-0.5466
Ruminococcus 1	0.7812		uncultured bacterium-17	-0.6411		Lachnospiraceae NK4A136 group	0.5614		Moryella	-0.5463
Dorea	0.7769		uncultured-39	-0.6378		Coprococcus 1	0.5508		Family XIII AD3011 group	-0.5417
Fusicatenibacter	0.7666		CHKCI001	-0.6375		Leptotrichia	0.5444		Oscillibacter	-0.5414
Lachnospiraceae UCG-001	0.7562		DNF00809	-0.6306		Succiniclasticum	0.5349		Ruminococcaceae NK4A214 group	-0.5386
Acidaminococcus	0.7485		Trueperella	-0.6264		Erysipelotrichaceae UCG-002	0.5341		Candidatus Methanomethylophilus	-0.5228
Lachnospiraceae FCS020 group	0.7376		Dielma	-0.6203		Solobacterium	0.5304		Desulfovibrio	-0.5218
Catenibacterium	0.7321		Clostridium sensu stricto 1	-0.62		Enterobacter	0.5292		uncultured-44	-0.514
Senegalimassilia	0.7231		Atopobium	-0.6195		Lachnospira	0.528		uncultured bacterium-55	-0.5065
Prevotella 7	0.7133		Howardella	-0.6135		Clostridium sensu stricto 6	0.5271		[Acetivibrio] ethanolgignens group	-0.5047
Lactobacillus	0.7118		Epulopiscium	-0.5987		Weissella	0.5189		gut metagenome-02	-0.5029
[Eubacterium] ventriosum group	0.6957		[Clostridium] innocuum group	-0.5982		Ambiguous_taxa-22	0.5172		Brevundimonas	-0.5006
uncultured bacterium-19	0.6783		uncultured bacterium-32	-0.5949		[Eubacterium] xylanophilum group	0.5155
Thermovirga	0.6752		Ruminococcaceae NK4A214 group	-0.59		Collinsella	0.5118
Methanosaeta	0.665		Anaerococcus	-0.5893		gut metagenome-03	0.5107
[Eubacterium] xylanophilum group	0.6649		Incertae Sedis	-0.5888		Prevotellaceae NK3B31 group	0.5107
{Unknown Genus} Ruminococcaceae	0.6638		uncultured-19	-0.5872		Marvinbryantia	0.5007
[Ruminococcus] torques group	0.6628		Terrisporobacter	-0.5826
Coprococcus 3	0.6603		Rikenellaceae RC9 gut group	-0.5784
Pelotomaculum	0.6585		Odoribacter	-0.5694
Anaerovibrio	0.6543		Actinobacillus	-0.5617
Enterorhabdus	0.6497		[Ruminococcus] gnavus group	-0.5571
Selenomonas 3	0.6453		Helicobacter	-0.5529
Lachnospiraceae NC2004 group	0.6431		Arcanobacterium	-0.5504
Sedimentibacter	0.6385		W5053	-0.5501
Sarcina	0.6369		Clostridioides	-0.5499
uncultured-05	0.6324		Clostridium sensu stricto 2	-0.5487
Ruminiclostridium 5	0.6272		Ambiguous_taxa-29	-0.5477
Streptococcus	0.6258		Campylobacter	-0.5455
Proteiniphilum	0.6253		Phascolarctobacterium	-0.5407
uncultured-09	0.6253		Pasteurella	-0.5402
Ambiguous_taxa-07	0.6239		Catabacter	-0.5381
Lachnospiraceae ND3007 group	0.6215		Finegoldia	-0.5262
uncultured-28	0.6204		Bifidobacterium	-0.5262
Anaerostipes	0.6192		Paraeggerthella	-0.5102
Ambiguous_taxa-10	0.6164		Porphyromonas	-0.5095
Proteiniclasticum	0.6153
GCA-900066575	0.6153
Carnobacterium	0.615
Lachnospiraceae NK4A136 group	0.6094
Erysipelotrichaceae UCG-009	0.6081
uncultured-10	0.5984
uncultured bacterium-05	0.5919
Succinivibrio	0.5796
Catenisphaera	0.5775
Thioalkalispira	0.5773
uncultured-40	0.576
Blvii28 wastewater-sludge group	0.5741
uncultured organism-05	0.5721
uncultured Chloroflexi bacterium-03	0.5641
Candidatus Caldatribacterium	0.5638
uncultured Bacteroidetes bacterium	0.5629
Oceanotoga	0.5624
uncultured-45	0.5609
Alcaligenes	0.5585
LNR A2-18	0.5556
Marinobacterium	0.5489
Syntrophorhabdus	0.5471
Desulfonatronum	0.5462
Ruminococcaceae UCG-009	0.5432
Ercella	0.543
Caldicoprobacter	0.5414
uncultured bacterium-34	0.5384
uncultured bacterium-38	0.5372
EBM-39	0.531
Petrimonas	0.5309
Anaerovorax	0.5163
Dethiobacter	0.5144
Pseudoramibacter	0.5115
Intestinibacter	0.5044
Ruminococcaceae UCG-003	0.5036

## Sheet: Supplementary table 6
Supplementary table 6: Comparison of redundancy analysis response scores (> 0.5) between jejunum and colon (day 29). Common microbial groups are marked in red (EF, jejunum and colon) and green (CON, jejunum and colon).
EF_Colon (d29)			CON_Colon (d29)			EF_Jejunum (d29)			CON_Jejunum (d29)
Microbial groups	Resp.1		Microbial groups	Resp.1		Microbial groups	Resp.1		Microbial groups	Resp.1
Subdoligranulum	0.8817		RumEn M2	-0.8347		Subdoligranulum	-0.8248		Ambiguous_taxa-16	0.8173
Lachnospiraceae ND3007 group	0.8333		Ambiguous_taxa-23	-0.8188		Holdemanella	-0.7851		UBA1819	0.7365
Dorea	0.7505		Intestinimonas	-0.794		Dorea	-0.7364		Moryella	0.7321
Prevotella 1	0.7166		uncultured bacterium-11	-0.7883		Prevotella 7	-0.6872		Elusimicrobium	0.6668
Actinomyces	0.7069		Aerosphaera	-0.7261		Roseburia	-0.6868		uncultured bacterium-03	0.6491
Catenisphaera	0.6974		Enterococcus	-0.6934		Lachnospiraceae ND3007 group	-0.6512		Erysipelothrix	0.6378
Globicatella	0.693		Pyramidobacter	-0.6903		Catenisphaera	-0.6333		Methanobrevibacter	0.6357
Fournierella	0.6903		Bilophila	-0.6735		Faecalibacterium	-0.6308		Enterococcus	0.6345
Holdemanella	0.6853		Methanobrevibacter	-0.6722		Prevotella 1	-0.6285		[Eubacterium] coprostanoligenes group	0.6318
Faecalibacterium	0.6803		Romboutsia	-0.6613		Ruminococcaceae UCG-008	-0.6235		Cloacibacillus	0.6287
Enterorhabdus	0.6798		Cloacibacillus	-0.6564		Lachnospiraceae NK3A20 group	-0.6158		Intestinimonas	0.6285
Lachnospiraceae NK3A20 group	0.6753		Mucispirillum	-0.6531		Succinivibrio	-0.603		Eubacterium	0.6269
Oribacterium	0.6713		CHKCI001	-0.6492		Ambiguous_taxa-15	-0.5985		Negativibacillus	0.6186
Agathobacter	0.6608		Cellulosilyticum	-0.6417		uncultured-22	-0.5872		Christensenellaceae R-7 group	0.6143
Prevotella 7	0.6558		Gallicola	-0.6373		Agathobacter	-0.5593		Sphaerochaeta	0.6133
Treponema 2	0.6478		uncultured bacterium-39	-0.6345		Eisenbergiella	-0.5582		uncultured-07	0.5988
Roseburia	0.6376		Parasutterella	-0.6294		Actinomyces	-0.5463		CHKCI001	0.598
Ruminococcaceae UCG-008	0.6346		Sutterella	-0.6261		Prevotella 9	-0.5453		Pyramidobacter	0.592
Succinivibrio	0.6279		Christensenellaceae R-7 group	-0.6163		Olsenella	-0.5427		Bilophila	0.5896
Prevotella 9	0.6203		uncultured bacterium-27	-0.606		Acidaminococcus	-0.5306		Clostridium sensu stricto 1	0.5772
Mitsuokella	0.6131		uncultured-39	-0.5956		Phaseolus acutifolius (tepary bean)	-0.5301		uncultured bacterium-13	0.5761
Lachnospiraceae FCS020 group	0.6106		uncultured bacterium-14	-0.5803		gut metagenome	-0.5235		Ruminococcaceae UCG-013	0.5682
Lactococcus	0.6093		Candidatus Methanoplasma	-0.5785		Butyricicoccus	-0.5219		Epulopiscium	0.5636
Curtobacterium	0.6		Anaerovorax	-0.5723		[Eubacterium] eligens group	-0.5188		Pseudomonas	0.5517
Acidaminococcus	0.5946		Sphaerochaeta	-0.571		Mitsuokella	-0.5177		Peptostreptococcus	0.5471
Blvii28 wastewater-sludge group	0.5881		Erysipelothrix	-0.5675		Oribacterium	-0.512		Cerasicoccus	0.5421
Ambiguous_taxa-04	0.586		Parabacteroides	-0.5622		Megasphaera	-0.5016		Aeromicrobium	0.5419
Streptococcus	0.5828		uncultured bacterium-16	-0.5602		Leptotrichia	-0.5005		[Eubacterium] brachy group	0.539
Atopobium	0.5734		uncultured-07	-0.5552					Terrisporobacter	0.5377
Megasphaera	0.57		Oxalobacter	-0.5514					Oxalobacter	0.5346
Ruminiclostridium 5	0.5648		uncultured bacterium-58	-0.5466					Pseudochrobactrum	0.5342
Lachnospiraceae NK4A136 group	0.5614		Moryella	-0.5463					Ignavigranum	0.5323
Coprococcus 1	0.5508		Family XIII AD3011 group	-0.5417					Ambiguous_taxa-05	0.522
Leptotrichia	0.5444		Oscillibacter	-0.5414					Oligella	0.5202
Succiniclasticum	0.5349		Ruminococcaceae NK4A214 group	-0.5386					Cellulosilyticum	0.5116
Erysipelotrichaceae UCG-002	0.5341		Candidatus Methanomethylophilus	-0.5228					Paraeggerthella	0.5087
Solobacterium	0.5304		Desulfovibrio	-0.5218					Bacteroides	0.5074
Enterobacter	0.5292		uncultured-44	-0.514					uncultured-35	0.5055
Lachnospira	0.528		uncultured bacterium-55	-0.5065					Gallicola	0.505
Clostridium sensu stricto 6	0.5271		[Acetivibrio] ethanolgignens group	-0.5047					uncultured-13	0.5028
Weissella	0.5189		gut metagenome-02	-0.5029
Ambiguous_taxa-22	0.5172		Brevundimonas	-0.5006
[Eubacterium] xylanophilum group	0.5155
Collinsella	0.5118
gut metagenome-03	0.5107
Prevotellaceae NK3B31 group	0.5107
Marvinbryantia	0.5007
